1 **An assessment of phylogenetic tools for analyzing the interplay between interspecific**  
2 **interactions and phenotypic evolution**

3  
4 Drury, J.P.<sup>1,2\*</sup>, Grether, G.F.<sup>2</sup>, Garland, Jr., T.<sup>3</sup>, & Morlon, H.<sup>1</sup>

5  
6 <sup>1</sup>Institut de Biologie, École Normale Supérieure, CNRS UMR 8197, 75005 Paris, France

7 <sup>2</sup>Department of Ecology & Evolutionary Biology, University of California, 621 Charles E.  
8 Young Dr. S, Los Angeles, CA 90095-1606, USA

9 <sup>3</sup>Department of Biology, University of California, Riverside, CA 92521, USA

10  
11 \*Corresponding author:

12 [druryj@ucla.edu](mailto:druryj@ucla.edu)

13 (424) 362-6230

14 621 Charles E. Young Dr. S

15 Los Angeles, CA 90095-1606, USA

16  
17 *Running head:* INTERSPECIFIC INTERACTIONS & TRAIT EVOLUTION

18  
19  
20  
21  
22  
23  
24  
25  
26  
27  
28

29 **Abstract**

30           Much ecological and evolutionary theory predicts that interspecific interactions often  
31 drive phenotypic diversification and that species phenotypes in turn influence species  
32 interactions. Several phylogenetic comparative methods have been developed to assess the  
33 importance of such processes in nature; however, the statistical properties of these methods have  
34 gone largely untested. Focusing mainly on scenarios of competition between closely-related  
35 species, we assess the performance of available comparative approaches for analyzing the  
36 interplay between interspecific interactions and species phenotypes. We find that currently used  
37 statistical methods largely fail to detect the impact of interspecific interactions on trait evolution,  
38 that sister taxa analyses often erroneously detect character displacement where it does not exist,  
39 and that recently developed process-based models have more satisfactory statistical properties. In  
40 weighing the strengths and weaknesses of different approaches, we hope to provide a clear guide  
41 for empiricists testing hypotheses about the reciprocal effect of interspecific interactions and  
42 species phenotypes and to inspire further development of process-based models.

43

44 *Keywords:* character displacement, competition, interspecific interactions, phylogenetic  
45 comparative methods, trait evolution

46

47

48 Interactions between species are a fundamental aspect of life on earth, and understanding  
49 the evolutionary and ecological consequences of such interactions are a central goal of many  
50 classical theoretical frameworks in ecology and evolutionary biology. Identifying both the  
51 predictors of interspecific interactions and the consequences of such interactions for  
52 diversification and coexistence is thus an important contemporary research area, with strong  
53 implications for conservation biology.

54 Several phylogenetic comparative methods have been deployed with the goal of  
55 elucidating how interspecific interactions drive (or are driven by) character evolution, but the  
56 reliability and efficacy of these methods remain largely untested. Here we focus on methods used  
57 to study interactions between closely related species (e.g., members of the same family) that  
58 arise from similarity in morphology, signaling traits or habitat (Brown and Wilson 1956;  
59 Schluter 2000; Pfennig and Pfennig 2009), rather than on community-wide interactions and  
60 interaction networks (Webb et al. 2002; Rezende et al. 2007; Cavender-Bares et al. 2009;  
61 Cadotte et al. 2013).

62 Classical character displacement theory (Brown and Wilson 1956; Grether et al. 2009;  
63 Pfennig and Pfennig 2009) predicts that, where heterospecifics compete, selection should favor  
64 divergence in the traits responsible for competition, until lineages in sympatry no longer compete  
65 intensely. In a seminal example, selection resulting from exploitative competition between  
66 medium and large ground finches (*Geospiza fortis* & *G. magnirostris*) has driven bill size  
67 divergence on Daphne Major in the Galápagos (Grant and Grant 2006). Investigators who  
68 conduct comparative studies of divergent character displacement often test for a relationship  
69 between biogeographic overlap and trait dissimilarity, predicting that coexisting species will be  
70 more phenotypically divergent than non-coexisting ones. Recent studies on *Bicyclus* butterflies

71 and *Euglossa* bees, for example, show that male chemical cues are more distinct between  
72 sympatric species than allopatric species, suggesting that reproductive character displacement  
73 has driven signal divergence in these taxa (Bacquet et al. 2015; Weber et al. 2016).

74 Interspecific interactions can also lead to convergent, rather than divergent, character  
75 displacement (Cody 1969, 1973; Grant 1972; Grether et al. 2013). Agonistic character  
76 displacement theory (Grether et al. 2013) predicts convergence in traits mediating interspecific  
77 aggression when species compete strongly for the same resources. In other words, between-  
78 species similarity in resource use may make interspecific territoriality adaptive, resulting in  
79 subsequent convergence in signaling traits involved in mediating territorial interactions (e.g.,  
80 song in ovenbirds, Tobias *et al.* 2014). Therefore, tests of convergent character displacement  
81 typically test the prediction that sympatric lineages are more phenotypically similar than  
82 allopatric ones. Because sympatric similarity can also result from convergence to local  
83 conditions (e.g., habitat, climate), it is important for empiricists to account for abiotic factors in  
84 tests of character convergence.

85 In some instances, rather than identifying the effect of species interactions on trait  
86 evolution, empiricists aim to identify traits that mediate particular pairwise interactions, such as  
87 hybridization or interspecific aggression. In this case, investigators test for a relationship  
88 between the measured interactions and trait similarity. Recent studies on New World warblers  
89 (Parulidae), for example, show that hybridization occurs more often between species with similar  
90 songs and that interspecific territoriality occurs more often between species that share similar  
91 plumage and territorial song phenotypes (Willis et al. 2014; Losin et al. 2016).

92 Although the examples presented here largely represent scenarios where interactions  
93 between species are competitive, empiricists apply methods discussed here to other non-

94 competitive interactions as well (e.g., predicting links in plant/pollinator networks, identifying  
95 Müllerian mimicry rings: Elias et al. 2008; Eklöf and Stouffer 2016). Regardless of the  
96 biological question, a particularity of comparative tests aimed at understanding the interplay  
97 between interspecific interactions and species phenotypes is that they largely involve testing  
98 correlations between pairwise data (e.g. range overlap, phenotypic similarity, frequency of  
99 hybridization). In contrast, most phylogenetic comparative methods have been developed and  
100 tested on tip data (e.g. range size, morphological trait values), and the statistical properties of  
101 methods adapted to handle pairwise data (Box 1) have gone untested (but see Harmon & Glor  
102 2010). Furthermore, species interactions are inherently affected by the biogeographic history of  
103 dispersal and speciation in an evolving clade and the resulting patterns of range overlap. Patterns  
104 of trait dissimilarity between sympatric lineages—the classic test of character displacement—  
105 may actually be the null expectation if allopatric speciation is the norm, because then sympatric  
106 species pairs will tend to share more distant common ancestors than allopatric species pairs do  
107 (Weir and Price 2011; Tobias et al. 2014).

108         Here, we apply the main phylogenetic comparative methods that investigators use to test  
109 hypotheses about interactions between closely related lineages and phenotypes (Box 1, Fig. 1) to  
110 datasets simulated under different evolutionary histories of speciation, dispersal, species  
111 interactions, and trait evolution. We then compare the efficacy of these methods, discuss the  
112 relative merits of each, and outline directions for future research.

113

114

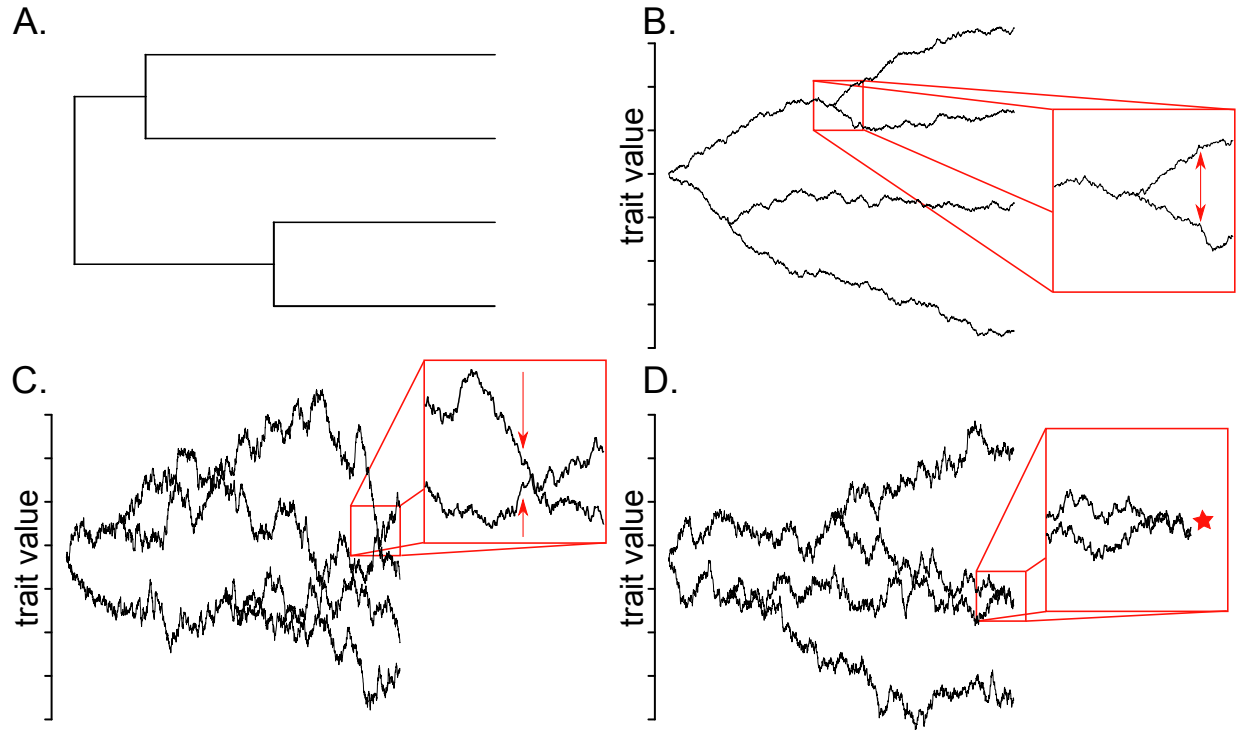

115  
116

117 *Figure 1.* Schematic examples of the processes examined in our simulation study. A. Phylogeny  
118 along which the trait evolves. B. A trait evolving via divergent character displacement, C. A trait  
119 evolving via convergent character displacement, and D. A species interaction that exists at  
120 present due to pairwise trait similarity. For simulation details, see the main text and  
121 *Supplementary Methods.*

122

123 **METHODS**

124

125           We compared the performance of different phylogenetic comparative methods by  
126 measuring their statistical power (e.g., probability of detecting divergence when divergence is  
127 simulated) and Type I error rate (e.g., probability of detecting an effect of species interactions  
128 when such an effect is not simulated) across three scenarios.

129

130 *Phylogeny and Range Simulations*

131

132           We jointly simulated trees {# spp. = 20, 50, 100, 150, 200, 250} and biogeographies  
133 under the dispersal-extinction-cladogenesis model of biogeographical evolution (i.e., DEC+J,  
134 with the inclusion of founder event speciation) in BioGeoBEARS (Ree and Smith 2008; Matzke  
135 2014). Briefly, the DEC+J model is a model of range evolution in which species ranges change  
136 along the branches of a phylogeny as a function of dispersal and local extinction and are  
137 inherited by daughter taxa at speciation according to several possible cladogenetic scenarios (see  
138 more details in Supplementary Methods). For each tree, we started with a single ancestral species  
139 occupying one of ten equidistant regions, and simulated trees with constant rates of speciation  
140 and local extinction. We considered different biogeographic scenarios by varying the rate of  
141 dispersal events between ranges (“high” and “low” dispersal; see details in Supplementary  
142 Methods) and the probability that speciation events occur in sympatry versus allopatry (“high”  
143 and “low” sympatric speciation; Supplementary Methods). Each of these simulations resulted in  
144 a phylogeny (the tree of extant species) and its associated biogeography (the set of regions in  
145 which each lineage occurred throughout the history of the clade). Lineages were identified as

146 sympatric if they co-occurred in at least one of the ten geographic regions, and allopatric if they  
147 did not co-occur in any.

148 We simulated four biogeographic scenarios (combinations of low or high dispersal and  
149 low or high sympatric speciation) for each tree size. The resulting biogeographies span scenarios  
150 where sympatric speciation is common and dispersal is low (e.g., lizards on islands) to scenarios  
151 where allopatric speciation is the main mode of speciation and dispersal between regions is high  
152 (e.g., birds on continents). These parameter combinations produced a range of realistic  
153 proportions of sister taxa that are sympatric (Fig. S1A) and a range of realistic differences in age  
154 between sympatric and allopatric sister taxa (Pigot and Tobias 2014; Fig. S1B). In defining  
155 sympatry as any overlap, the mean magnitude of range overlap fell between 33-42% across all  
156 tree sizes and simulation parameters (Fig. S1C,D), which falls well within the range of overlap of  
157 sympatric taxa defined under commonly used minimum threshold values applied to continuous  
158 indices of range overlap (e.g. Pigot and Tobias 2014; Tobias et al. 2014).

159 For each combination of tree sizes and DEC parameter combinations ( $n = 24$ ), we  
160 performed 100 simulations, resulting in a bank of 2,400 trees with associated biogeographies.

161

### 162 *Character Displacement*

163 *The model.*—To simulate both divergent and convergent character displacement, we  
164 simulated a continuous trait  $z$  under a model in which trait values of sympatric species in an  
165 evolving clade are repelled from (or drawn toward) one another. In divergent character  
166 displacement, trait divergence is driven by pairwise similarity in that same trait  $z$ ; in convergent  
167 character displacement however, convergence in trait  $z$  (e.g. a signaling trait) is driven by  
168 pairwise similarity in another trait  $y$  (e.g. a resource use trait). To create a generic model of



169 character displacement, we thus modified the matching competition model (Nuismer & Harmon  
170 2015; Drury *et al.* 2016) by describing the mean value for trait  $z$  in lineage  $i$  after an  
171 infinitesimally small time step  $dt$  by:

172

$$173 \quad z_i(t + dt) = z_i(t) + \psi(\theta - z_i(t))dt + m \left[ \sum_{j \neq i}^n \mathbf{A}_{i,j} \times \text{sign}(z_i(t) - z_j(t)) \times e^{-\alpha(y_j(t) - y_i(t))^2} \right] dt + \delta$$

174 (Eq. 1)

175

176 where  $y = z$  in the case of divergent character displacement and  $y \neq z$  in the case of divergent  
177 character displacement,  $\psi(\theta - z_i(t))$  describes attraction to a single stationary peak (i.e., the  
178 Ornstein-Uhlenbeck [OU] process, Felsenstein 1988; Garland *et al.* 1993; Hansen and Martins  
179 1996),  $n$  is the number of species,  $\delta$  is a random variable with mean 0 and variance =  $\sigma^2 dt$  (the  
180 Brownian motion [BM] rate parameter, describing the stochastic component of trait evolution),  
181 and  $\mathbf{A}$  is a piecewise-constant matrix representing biogeographical overlap such that  $\mathbf{A}_{i,j}$  equals 1  
182 if species  $i$  and  $j$  are sympatric at time  $t$ , and 0 otherwise. The “sign” portion determines the  
183 relative position of each species in trait space (i.e. it equals +1 if  $z_i$  is larger than  $z_j$ , and -1  
184 otherwise). The  $\alpha$  value ( $\alpha > 0$ ) determines the effect of pairwise similarity in trait  $y$  on  
185 competition: if  $\alpha$  is close to zero, all lineages sympatric with lineage  $i$  have the same competitive  
186 effect on  $i$ , regardless of their similarity in trait  $y$ ; conversely, if  $\alpha$  is large, sympatric lineages  
187 similar to  $i$  in terms of the  $y$  trait will have a much stronger competitive effect on  $i$  than  
188 sympatric lineages dissimilar to  $i$  in terms of the  $y$  trait. The parameter  $m$  represents the  
189 magnitude of the effect of competition when two lineages have identical  $y$  values (i.e., it provides  
190 an upper bound for the deterministic effect of competition). When  $m = 0$ , this equation reduces to  
191 an OU model, whereas positive  $m$  values result in pairwise divergence and negative values result

192 in pairwise convergence. When both  $m$  and  $\psi = 0$ , this model reduces to Brownian motion. For  
193 additional simulation details, see *Supplementary Methods*.

194 We use a lineage-based “phenomenological” model for our simulations rather than an  
195 individual-based model to have the computational ability to produce datasets of a size  
196 comparable to the maximum sometimes reached in empirical comparative phylogenetic studies  
197 (i.e. often reaching several hundreds of species). Models derived from microevolutionary first  
198 principles (e.g., Grether et al. 2009; Nuismer and Harmon 2015) generate similar patterns of  
199 sympatric shifts resulting from character displacement, and using such a model here would be  
200 much more computationally intensive, therefore restricting the range of parameter values that  
201 can be studied. For simplicity, this model also omits the effect of a species’ geographic structure  
202 and the effect of gene flow between distinct populations on the evolution of the mean species  
203 phenotype. This simplification is reasonable in the context of our study because there is no  
204 reason to expect that it will systematically bias the patterns generated in such a way as to yield  
205 different conclusions regarding the performance of the various analytical approaches that we use  
206 here. Finally, in all of our simulations, we considered sympatry to be a binomial variable, so  $A_{i,j}$   
207 equaled either 1 (if species  $i$  and  $j$  are sympatric) or 0 (if species  $i$  and  $j$  are allopatric). This index  
208 of sympatry is similar to commonly used indices (Pigot and Tobias 2014; Tobias et al. 2014), but  
209 other formulations of sympatry, such as continuous measurements of range overlap (Bothwell et  
210 al. 2015; Martin et al. 2015) are also possible. We did not explore continuous measurements of  
211 range overlap here, but have uploaded our simulation scripts to RPANDA (Morlon et al. 2016;  
212 <https://github.com/hmorlon/PANDA>), which could easily be modified to do so.

213

214           *Divergent character displacement.*—We simulated datasets with divergent character  
215 displacement by setting  $y = z$  in Eq. 1 such that trait divergence is driven by pairwise similarity  
216 in that trait. Biologically, this could represent a feeding trait that co-varies with resource use  
217 (e.g., bill shape in Galápagos finches, Grant & Grant 2011) and which would be directly affected  
218 by interspecific competition. To assess whether each method could detect divergent character  
219 displacement when it occurred and did not erroneously detect character displacement when it  
220 was absent, we simulated datasets both with repulsion  $\{m = 2\}$  and without repulsion  $\{m = 0\}$   
221 (see Supplementary Methods). We also simulated datasets with  $\{\psi = 2\}$  and without  $\{\psi = 0\}$  the  
222 OU process. In all simulations, we held  $\sigma^2$  constant at 0.5,  $\alpha$  constant at 1, and both the state at  
223 the root ( $z_0$ ) and the OU optimum ( $\theta$ ) constant at 0.

224           In additional simulations run only on 100-species trees, we analyzed the effect of both the  
225 maximum strength of repulsion  $\{m = 0, 1, 2, 10\}$  and, to understand how the opposing forces of  
226 repulsion and attraction to an optimum influence analyses, the ratio of attraction to the maximum  
227 effect of competition  $\{\psi:m = 0, 0.2, 0.5, 1\}$  on inferences. To achieve these ratios of  $\psi:m$ , we  
228 varied  $\psi$  while holding  $m$  constant (e.g., for the case where  $m = 2$ , we simulated datasets where  $\psi$   
229 = 0, 0.4, 1, and 2, respectively). As above, these values were arbitrarily chosen based on visual  
230 inspection of realized simulations.

231           For each parameter combination, we simulated 10 datasets for each tree, resulting in  
232 1,000 simulations for each tree size / biogeographic scenario combination.

233  
234           *Convergent character displacement.*—We simulated datasets with convergent character  
235 displacement under Eq. 1, where the term  $y$  represents a trait determining resource use or niche  
236 occupation evolving via BM or OU. A species' trait  $z$  in this model—a trait used as a territorial

237 signal—is thus attracted most strongly to the signal trait values of sympatric lineages with the  
238 most similar resource-use traits. Biologically, this represents a scenario where selection favors  
239 interspecific territoriality—mediated by similarity in territorial signals—because the benefits of  
240 excluding heterospecifics are similar to the benefits of excluding conspecifics (Grether et al.  
241 2009). As a species' resource-use trait becomes less similar to that of sympatric species, the  
242 strength of attraction decreases to zero.

243 We simulated resource-use traits under both BM ( $\sigma^2_{resource} = 0.5, \psi_{resource} = 0$ ) and OU  
244 ( $\sigma^2_{resource} = 0.5, \psi_{resource} = 2, \theta_{resource} = 0$ ) models. For the signal trait, we simulated datasets both  
245 with convergence  $\{m = -0.25\}$  and without convergence  $\{m = 0\}$ . We did not include attraction  
246 toward a stable peak for the signal trait (i.e.  $\psi$  was held constant at 0). As above, we held  $\sigma^2 = 0.5$   
247 and  $z_0 = 0$ , though we held  $\alpha$  constant at 10, since smaller values result in rapid, cladewise  
248 convergence in traits. To analyze the effect of the maximum strength of convergence, we ran  
249 another set of simulations on 100-species trees varying  $m$   $\{m = 0, -0.1, -0.25, -0.5\}$  (see  
250 Supplementary Methods). The resource trait ( $y$ ) and signal trait ( $z$ ) were modeled as unlinked and  
251 genetically uncorrelated.

252 As above, we simulated 10 datasets for each tree, resulting in 1,000 simulations for each  
253 tree size / biogeographic scenario combination.

254

### 255 *Predictors of Interspecific Interactions*

256 In some cases, investigators wish to identify which factors explain the occurrence of  
257 particular interspecific interactions. For example, investigators may want to understand which  
258 traits cause species to hybridize (e.g., Willis et al. 2014). In this scenario, species interactions  
259 vary according to phenotypic similarity between sympatric species pairs (i.e., species pairs that

260 could potentially interact). Additionally, and unlike character displacement analyses, predicting  
261 the occurrence of interspecific interactions requires treating trait similarity as a predictor variable  
262 rather than a response variable. Thus, we generated datasets where the presence of interactions  
263 between sympatric taxa depends on pairwise similarity in traits.

264 Under this scenario, we first evolved a trait along the phylogeny under a BM ( $\sigma^2 = 0.5$ ,  $\psi$   
265  $= 0$ ) or OU ( $\sigma^2 = 0.5$ ,  $\psi = 2$ ,  $\theta = 0$ ) model. Next, we simulated a second, independently evolving  
266 trait ( $\sigma^2_{unmeasured} = 1$ ,  $\psi_{unmeasured} = 0$ ) to represent an unmeasured trait that could cause the  
267 interaction of interest. To generate datasets where species interactions depend on similarity in  
268 trait space at the present, we created species interactions in the form of a binomial variable by  
269 sampling from a binomial distribution with the probability of interaction equal to:

270

$$271 \quad P = \frac{e^{(b_1 Dx_1 + b_2 Dx_2)}}{1 + e^{(b_1 Dx_1 + b_2 Dx_2)}}$$

272 (Eq. 2)

273

274 (e.g., Hilbe 2009) where  $Dx_n$  is the distance between species at the present (e.g., distance  
275 between tip values) in simulated trait  $n$  (simulated using fastBM in phytools, Revell 2012), and  
276  $b_n$  is the coefficient determining the magnitude of the relationship between the species  
277 interaction and similarity in trait  $n$ . Trait 1 is the measured, focal trait and trait 2 represents the  
278 independently evolving, unmeasured trait. As the effect of  $b_n$  on the species interaction depends  
279 on the  $Dx_n$  distribution, which in turn depends on the total height of the tree, we scaled the trees  
280 to a height of one prior to simulating datasets to facilitate comparison of results across trees and  
281 parameter space.

282 To determine the statistical power of each analytical method, we generated species  
283 interactions based on similarity in the measured trait ( $b_1 = -4$ ,  $b_2 = 0$ ); to assess the Type I error  
284 rate, we simulated species interactions based on similarity in the unmeasured trait ( $b_1 = 0$ ,  $b_2 = -$   
285 4). To determine the effect of the magnitude of the coefficient determining the relationship  
286 between the measured trait and the interactions, we ran another set of simulations on 100-species  
287 trees varying  $b_1$   $\{b_1 = 0, -2, -4, -6, -8\}$  and holding  $b_2 = -4$ . As above, we ran 1,000 simulations  
288 for each tree size / biogeographic scenario combination.

289

### 290 *Phylogenetic Tests*

291 Among our tests of character displacement (both divergent and convergent), the  
292 “correlation” tests involved assessing the significance of the relationship between phenotypic  
293 similarity and coexistence, using either the “full” dataset (all species pairs) or the “sister taxa”  
294 subset obtained by culling sister taxa from trees with  $\geq 150$  tips (Box 1, Diagram S1). To the full  
295 datasets, we applied standard non-phylogenetic regression analyses that ignore phylogenetic non-  
296 independence (Box 1.1), the raw and phylogenetically permuted partial Mantel tests (Box 1.2,  
297 1.3), phylogenetic linear mixed models (PLMMs, Box 1.4), and the simulation approach (Box  
298 1.5, Supplementary Methods). To the sister-taxa datasets, we applied non-phylogenetic  
299 regression analyses (Box 1.1), PLMMs (Box 1.4), the simulation approach (Box 1.5), sister-taxa  
300 GLMs (Box 1.7), and fit process based models in EvoRAG (Box 1.8, Supplementary Methods).  
301 We did not perform Mantel tests on the sister-taxa data because such tests require complete  
302 matrices and distance matrices with data for only sister taxa would mostly contain empty cells  
303 (i.e. all those cells that correspond to non sister taxa species pairs). We compared the fit of  
304 process-based phenotypic models with and without species interactions (Brownian motion,

305 Ornstein-Uhlenbeck, diversity dependent, and matching competition models; see Box 1.6 and  
306 Supplementary Methods) to the full datasets from divergence scenarios using the R packages  
307 *geiger* (Pennell et al. 2014) and *RPANDA* (Morlon et al. 2016). We acknowledge that diversity-  
308 dependent models were not designed to analyze character displacement *per se*, but because they  
309 incorporate interspecific interactions, we hypothesized that (and wanted to test if) they could be  
310 useful in doing so. We did not apply process-based models to convergence scenarios because the  
311 necessary model fitting tools have yet to be developed (see Discussion).

312 Our tests of predictors of species interactions involved assessing the significance of the  
313 relationship between phenotypic similarity and species interactions (i.e., whether the species  
314 interact where they occur in sympatry). Since the response variable is binary, we fit non-  
315 phylogenetic logistic regressions, logistic PLMMs, and employed the simulation approach (see  
316 Supplementary Methods). We did not perform Mantel tests or sister-taxa analyses because the  
317 species pair matrix was incomplete (species that do not coexist cannot interact) and typically too  
318 few sister taxa occurred in sympatry for regression analysis.

319

## 320 **RESULTS**

321

### 322 *Divergent Character Displacement*

323 When all possible pairwise comparisons are included in analyses, the ability of most  
324 methods to detect divergent character displacement depends on the presence of the OU process.  
325 As expected, non-phylogenetic regression analyses have a high Type I error rate in either  
326 scenario (Figs. 2Ai,iv, S2Ai,iv [NB: throughout, results for low sympatric speciation  
327 biogeographies are plotted in the main text and high sympatric speciation biogeographies in the

328 supplement]). When the OU process is present ( $\psi = 2$ ), all methods generally have low Type I  
329 error rates and high power (Figs. 2Aiv-vi, S2iv-vi, Supplementary Tables). However, when there  
330 is no pull toward a peak ( $\psi = 0$ ), the Type I error rate is higher for Mantel tests (Figs. 2Ai-ii, S2i-  
331 ii), and the power is much lower for all methods, though the pppMantel and raw Mantel perform  
332 better than the simulation and PLMM methods (Figs. 2Aiii, Fig. S2iii). Repulsion is easier to  
333 detect against an OU background of traits converging toward a common optimum than against a  
334 background of traits diverging under BM, likely because the repulsion process is more active  
335 when species occupy similar trait space (Figs. S3, S4). High rates of sympatric speciation and  
336 dispersal tend to slightly decrease the power of all methods (Fig. S2ii,iv, Supplementary Tables).

337         The ability to detect divergence was relatively similar for  $m = 1$  and  $m = 2$ , but declined  
338 for  $m = 10$  (Fig. S5). This is due to a positive relationship between the ability to detect character  
339 displacement and the ratio of  $\psi:m$  (Fig. S6), resulting from a higher absolute magnitude of  
340 repulsion when both processes are present (Figs. S4, S6), indicating that this ratio impacts the  
341 ability to detect divergence more than the raw value of  $m$ .

342         For sister-taxa analyses, there is a high probability of falsely concluding that character  
343 displacement occurred in datasets simulated under BM and, to a lesser extent, OU, whether  
344 analyzed with simple linear regressions, sister-taxa GLMs, or PLMMs (Figs. 2Bi,iii, S2Bi,iii).  
345 As with the whole-tree approach, the power tends to increase and Type I error rate tends to  
346 decrease in datasets with attraction toward a single-stationary peak (Figs. 2Biv-vi, S2Biv-vi).  
347 However, the overall power to infer the presence of divergence was low with sister-taxa analyses  
348 (Figs. 2Biii,vi, S2Biii,vi). Inferences were generally better when dispersal was high, which may  
349 reflect the elevated observed divergence in high dispersal scenarios (Fig. S3). Allopatric  
350 speciation scenarios increased the probability of Type I error (Fig. 2Bi-ii).



351 For the phylogenetic trait model-fitting analyses, BM and OU were generally correctly  
352 chosen when they were the generating models (i.e., when  $m = 0$  and when  $\psi = 0$  or 2,  
353 respectively, Figs. 3, S8). When  $\psi = 0$  and  $m > 0$ , the matching competition (MC) model with  
354 biogeography is consistently the best-fit model (Figs. 3A, S8A). When  $m > 0$  and  $\psi = 2$ , the  
355 diversity dependent exponential (DD<sub>exp</sub>) model with biogeography was favored over other  
356 models in most scenarios (Figs. 3B, S8B), with positive rate parameters estimated in the  
357 maximum likelihood solution (Fig. S9). The biogeographic scenario did not greatly affect the  
358 outcome of model fitting, though correct models were slightly more supported when dispersal  
359 was high (Fig. S10), again in agreement with the observed magnitude of repulsion (Fig. S3).  
360 Although the models are less identifiable when  $m = 10$  and  $\psi = 2$  (Figs. 3, S8), this results from  
361 variation in the  $\psi:m$  ratio— there is a ratio of  $\psi:m$  around which these models cannot be  
362 distinguished (Fig. S11).

363 Process-based models fit to sister-taxa datasets in EvoRAG did not mistakenly identify an  
364 effect of species interactions when they were absent (Fig. S4A, C, Table 2), but they were unable  
365 to identify the effect of competition when  $\psi = 0$  (Fig. S4B, Table 2). However, as with process-  
366 based models fit to the whole phylogeny, when data were simulated with both repulsion and a  
367 pull toward a stable peak, a model where evolutionary rates vary linearly with the number of  
368 sympatric taxa is often the best-fit model, though generally with only a marginally lower AICc  
369 value (i.e.,  $\Delta\text{AICc} < 2$ ) than BM (Fig. S4, Table 2).

370

371

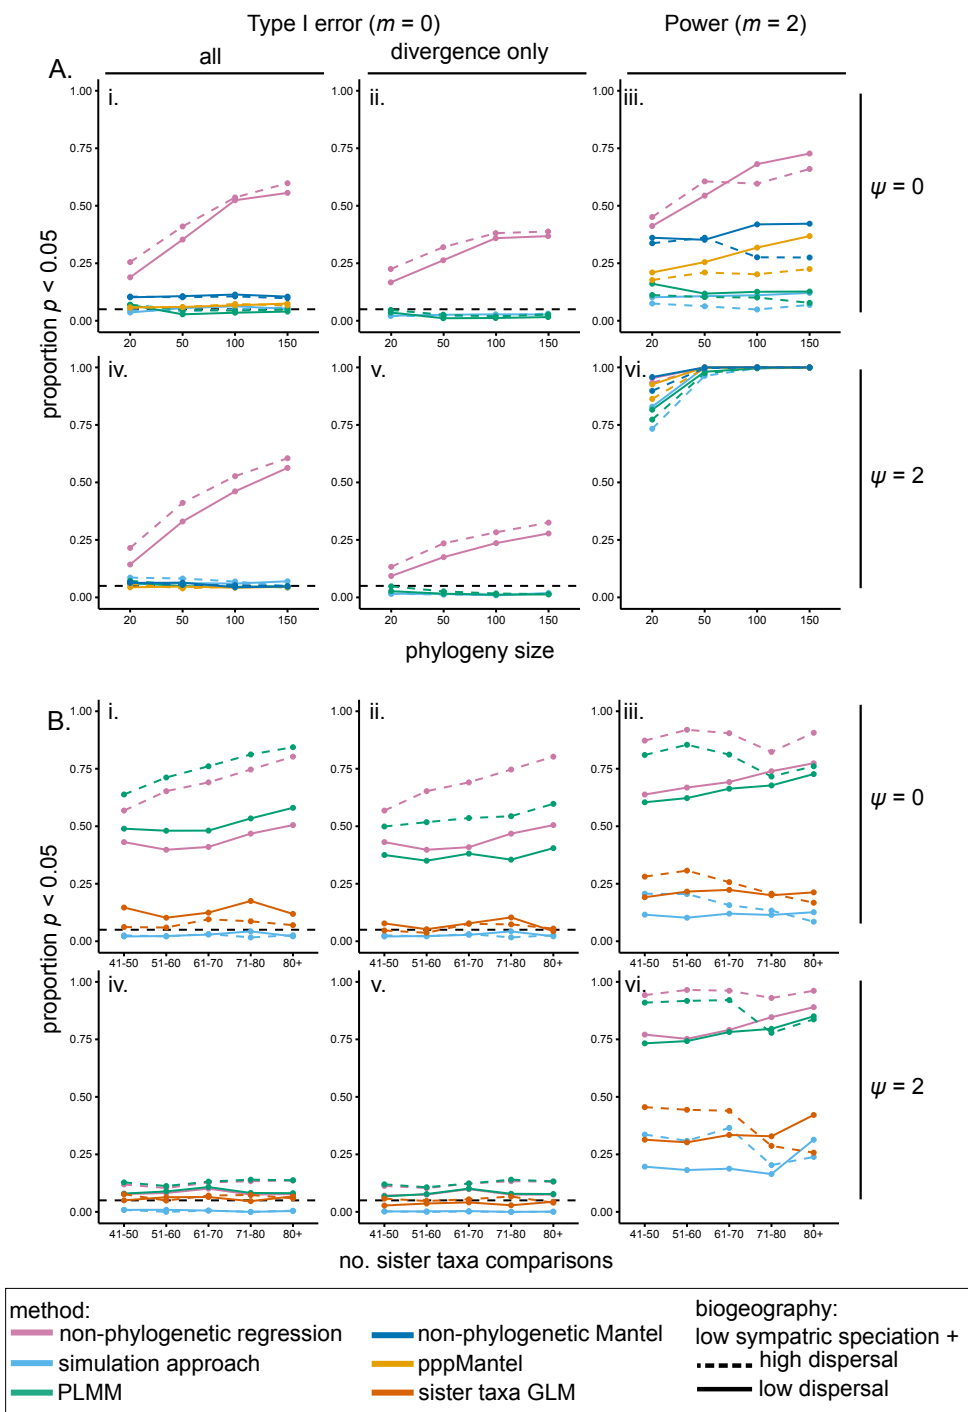

372

373 *Figure 2.* Proportion of statistically significant analyses in datasets simulated under divergent

374 character displacement in biogeographic scenarios with low sympatric speciation rates. A.

375 Results from approaches using data from all pairwise comparisons in a clade, plotted as a

376 function of the phylogeny size and dispersal rate when i-ii.  $m = 0$  and  $\psi = 0$  (i. all analyses and ii.

377 only analyses returning divergence in sympatry), iii.  $m = 2$  and  $\psi = 0$ , iv-v.  $m = 0$  and  $\psi = 2$  (iv.  
378 all analyses and v. only analyses returning divergence in sympatry), and vi.  $m = 2$  and  $\psi = 2$ . B.  
379 Results from analyses of sister-taxa culled from complete phylogenies binned by the number of  
380 resulting species pairs, plotted as a function of the number of sister taxa comparisons and  
381 dispersal rate when i-ii.  $m = 0$  and  $\psi = 0$  (i. all analyses and ii. only analyses returning  
382 divergence in sympatry), iii.  $m = 2$  and  $\psi = 0$ , iv-v.  $m = 0$  and  $\psi = 2$  (iv. all analyses and v. only  
383 analyses returning divergence in sympatry), and vi.  $m = 2$  and  $\psi = 2$ . For scenarios where  $m = 2$ ,  
384 only the proportion of significant results showing divergence are plotted. Dashed horizontal lines  
385 represent a Type I error rate of 5%.

386  
387

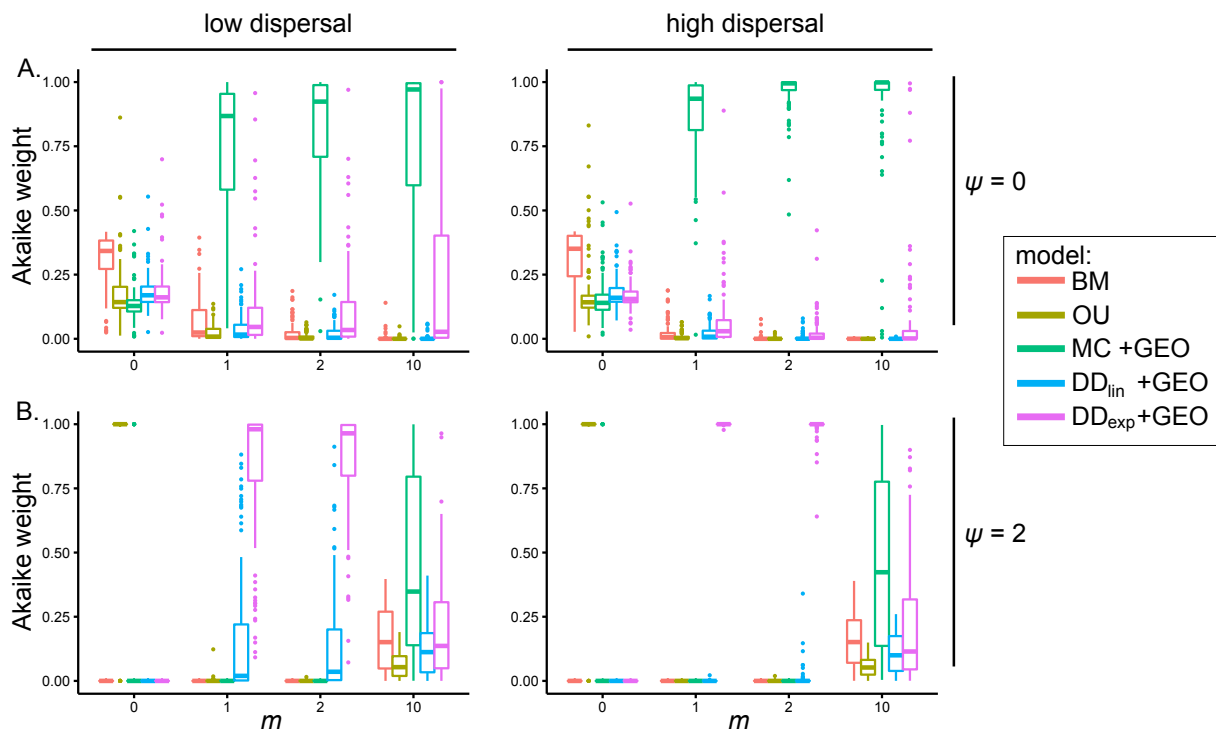

388  
389 *Figure 3.* Boxplots of Akaike weights for each trait model fit to simulated datasets in  
390 biogeographic scenarios with low sympatric speciation rates as a function of  $m$  in trees with 100  
391 species. A. When OU is absent, BM is the best-fit model when  $m = 0$ , and the matching  
392 competition model with biogeography is the best model when competitive divergence is present.  
393 B. When OU is present, OU is the best-fit model when  $m = 0$ , and the diversity-dependent  
394 exponential model with biogeography is the best model when competitive divergence is present  
395 and  $\psi:m$  is relatively high.

396

397 *Convergent Character Displacement*

398       As with divergent character displacement, with all pairwise species combinations, the  
399 ability of most methods to detect convergent character displacement depends on the presence of  
400 the OU process on the resource-use trait: datasets simulated under an OU model were more  
401 likely to be statistically significant (Figs. 4A.iv-vi, S12A.iv-vi) across all methods than those  
402 with BM simulated resource-use traits (Figs. 4A.i-iii, S12A.i-iii). Again, this is likely because  
403 the presence of the OU process in the resource-use trait amplifies the magnitude of convergence  
404 (Fig. S13, S14). Overall, however, only the simulation approach had substantial power ( $> 0.80$ )  
405 to detect convergent character displacement (Table 1), and only in trees with 100 or more tips  
406 and datasets with the OU process in the simulated resource-use trait. Indeed, the non-  
407 phylogenetic regressions often (spuriously) detected divergence rather than the simulated  
408 convergence, especially in smaller trees (Supplementary Tables). Both types of Mantel tests were  
409 unable to detect convergence, in fact having a higher Type I error rate (detecting divergence in  
410 BM simulated datasets, Supplementary Tables) than power. As with divergent character  
411 displacement, there was a tendency for higher power in lower dispersal scenarios.

412       The power to detect convergence generally increased with increasingly negative values of  
413  $m$ , the maximum strength of attraction in the signal trait when species are identical in the  
414 resource-use trait (Fig. S15), though as  $m$  gets large, the probability that all species converge on  
415 the same trait value increases, especially when  $\psi_{\text{resource}} = 2$  (data not shown).

416       Regardless of whether resource-use traits are simulated under OU or BM, when there is  
417 no convergence, most methods used for sister-taxa analyses tend to have high Type I error rates,  
418 though these analyses return an erroneous inference of divergence, rather than convergence,  
419 between sister taxa (Figs. 4B.i,ii,iv,v, S12B.i,ii,iv,v, Supplementary Tables). Sister-taxa analyses  
420 had overall low power to detect convergence when it did exist, and non-phylogenetic regressions

421 often detected divergence, rather than convergence (Supplementary Tables). When convergence  
422 was detected, it tended to be in biogeographic scenarios with high dispersal, likely reflecting the  
423 overall magnitude of convergence achieved (Fig. S13). As with divergent character displacement  
424 simulations, the allopatric speciation biogeographic scenarios were more likely to lead to higher  
425 Type I error rates (Figs. 4B.i,iv). Process-based models fit to sister-taxa datasets in EvoRAG did  
426 not erroneously detect divergence or convergence (i.e., BM was the best-fit model when  $m = 0$ ,  
427 Fig. S14 A, C, Table 2), but they could not detect an effect of species interactions when  
428 convergence was present, at least for the number of sister taxa in this study, as OU was the best-  
429 fit model when  $m = -0.25$  (Fig. S14 B, C, Table 2).

430

431

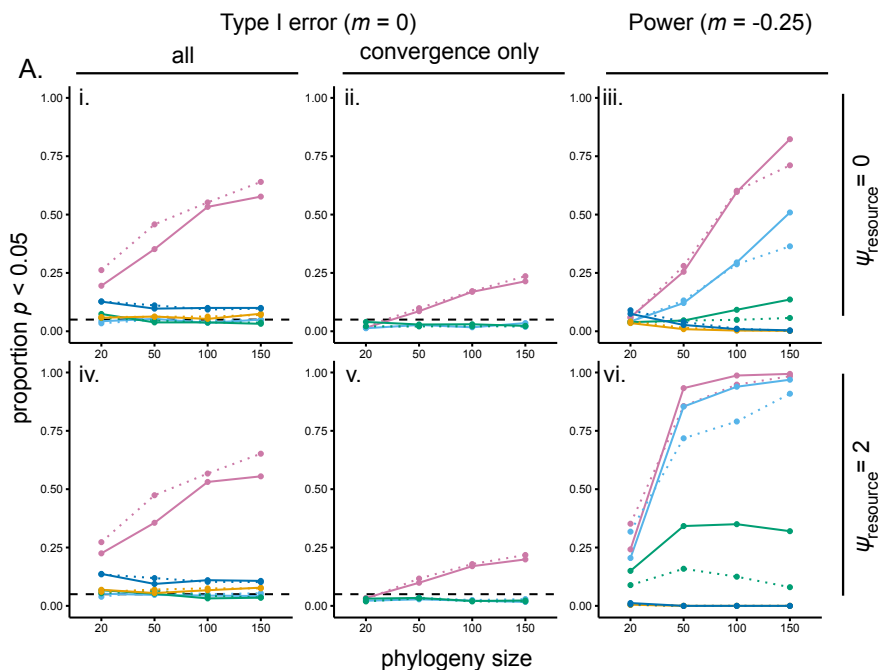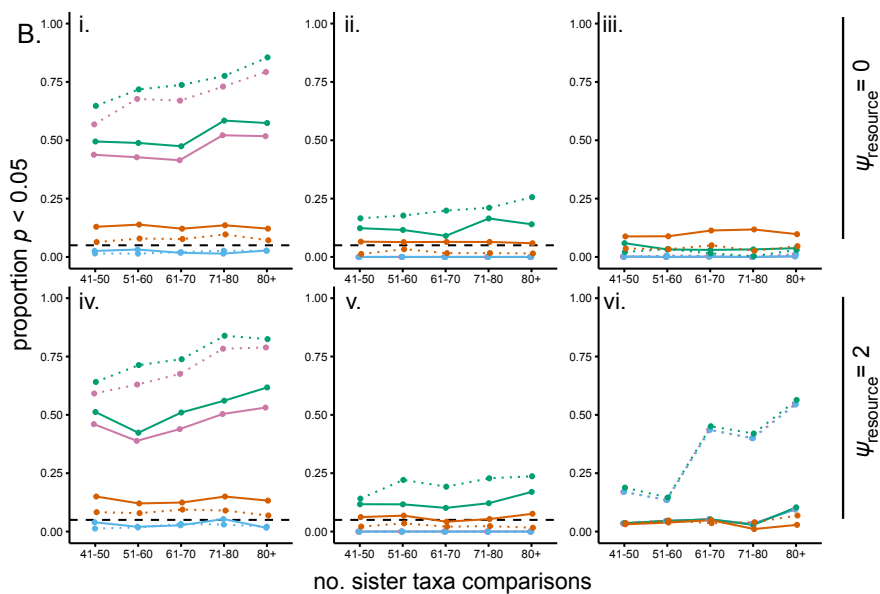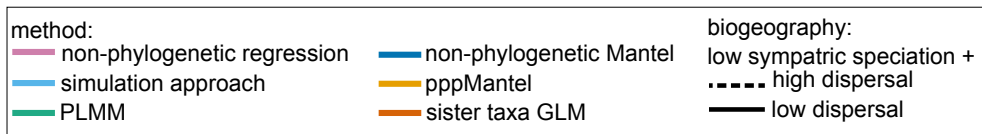

432  
 433 *Figure 4.* Proportion of statistically significant analyses in datasets simulated under convergent  
 434 character displacement in biogeographic scenarios with low sympatric speciation rates. A.  
 435 Results from approaches using data from all pairwise comparisons in a clade, plotted as a  
 436 function of the phylogeny size and dispersal rate when i-ii.  $m = 0$  and  $\psi_{resource} = 0$  (i. all analyses

437 and ii. only analyses returning convergence in sympatry), iii.  $m = -0.25$  and  $\psi_{resource} = 0$ , iv-v.  $m$   
438  $= 0$  and  $\psi_{resource} = 2$  (iv. all analyses and v. only analyses returning convergence in sympatry),  
439 and vi.  $m = -0.25$  and  $\psi_{resource} = 2$ . B. Results from analyses of sister-taxa culled from complete  
440 phylogenies binned by the number of resulting species pairs, plotted as a function of the number  
441 of sister taxa comparisons and dispersal rate when i-ii.  $m = 0$  and  $\psi_{resource} = 0$  (i. all analyses and  
442 ii. only analyses returning convergence in sympatry), iii.  $m = -0.25$  and  $\psi_{resource} = 0$ , iv-v.  $m = 0$   
443 and  $\psi_{resource} = 2$  (iv. all analyses and v. only analyses returning convergence in sympatry), and vi.  
444  $m = -0.25$  and  $\psi_{resource} = 2$ . For scenarios where  $m = -0.25$ , only the proportion of significant  
445 results showing convergence are plotted. Dashed horizontal lines represent a Type I error rate of  
446 5%.  
447



448 *Predicting Interspecific Interactions*

449

450           Although all three methods used to identify traits that are causally related to interspecific  
451 interactions had high power ( $\gg 0.8$ , Table 1, Supplementary Tables) to do so in the parameter  
452 space explored here (Figs. 5ii,iv, S16ii,iv), only the simulation approach had both high power  
453 and a low Type I error rate (Table 1), whereas non-phylogenetic regressions and PLMMs had  
454 fairly high Type I error rates (Table 1) when interactions were simulated based on similarity in a  
455 trait other than the measured one (Fig. 5i,iii, S16i,iii). The power to detect an interaction was not  
456 greatly affected by the coefficients used to simulate datasets (Fig. S17). Biogeography did not  
457 have a large impact on analyses, though there were slightly higher Type I error in low-dispersal  
458 scenarios (Fig. 5i,iii).

459

460

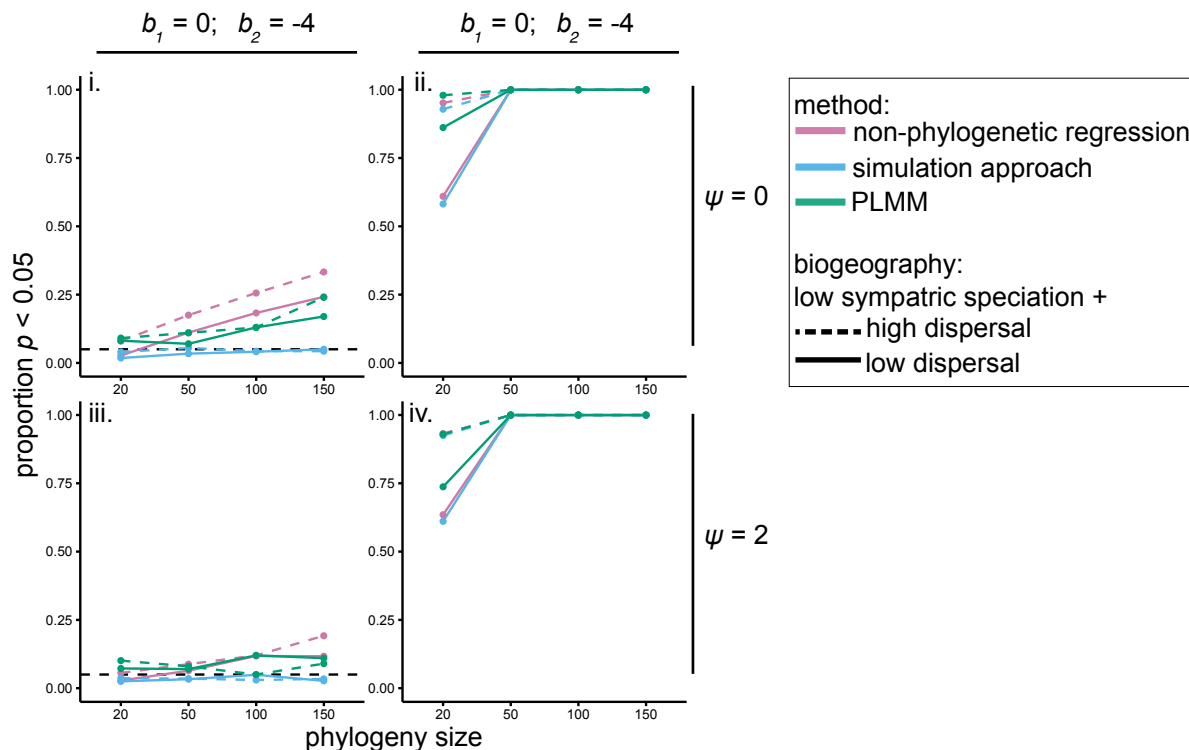

461  
 462 *Figure 5.* Proportion of statistically significant analyses in datasets with interactions simulated  
 463 under a simple phenotype matching process in biogeographic scenarios with low sympatric  
 464 speciation rates. Results from analyses where the measured trait was simulated under BM (i, ii)  
 465 or OU (iii, iv), plotted as a function of the phylogeny size and dispersal rate when i.  $b_1$  (the  
 466 simulation coefficient determining the relationship between the interaction and the measured  
 467 trait) = 0,  $b_2$  (the simulation coefficient for an unmeasured trait) = -4, and  $\psi = 2$ , ii.  $b_1 = -4$ ,  $b_2 =$   
 468 0, and  $\psi = 2$ , iii.  $b_1 = 0$ ,  $b_2 = -4$ , and  $\psi = 0$ , and iv.  $b_1 = -4$ ,  $b_2 = 0$ , and  $\psi = 0$ .  
 469

## 470 **DISCUSSION**

471 As open-access databases with species range, trait, and phylogenetic data rapidly expand,  
472 investigators are able to test hypotheses about the relationships between interspecific interactions  
473 and phenotypic evolution at an unprecedented scale. Understanding the relative strengths and  
474 weaknesses of phylogenetic comparative methods available for testing such hypotheses is thus  
475 paramount. We found that currently used methods for detecting causal relationships between  
476 interspecific interactions and species phenotypes suffer from severe limitations (Tables 1,2).

477 Overall, standard methods are better at detecting divergent character displacement when  
478 divergence does not drive unbounded trait evolution (i.e., when selection acts against extreme  
479 phenotypes, as can be modeled by the OU process). Consistent with previous reports (Harmon  
480 and Glor 2010; Guillot and Rousset 2013), Mantel tests had high Type I error rates and both  
481 standard and pppMantel tests have low power (Table 1, Figs. 2Ai, S2Ai). Alarming, we found  
482 that commonly used sister taxa approaches have high Type I error rates (Table 2, Figs. 2Bi,iv,  
483 S2Bi,iv, 4Bi,iv, S12Bi,iv, Supplementary Tables), which would lead investigators to conclude  
484 that divergent character displacement had occurred when, in fact, it had not, and none have a  
485 reasonable combination of Type I error and power. Thus, we discourage empiricists from using  
486 sister-taxa approaches to study character displacement. If no other data are available for testing  
487 for character displacement on the whole tree, then we recommend phylogenetic simulations, as  
488 they are the only method with reasonably low type I error rates, even though they suffer from  
489 low power (Tables 1, 2).

490 Fitting process-based phylogenetic trait models to datasets simulated with divergent  
491 character displacement yielded more consistent patterns (Fig. 3). Without attraction toward a  
492 single stationary peak to bound trait evolution, the matching competition (MC) model with

493 biogeography was predominantly the best-fit model. For datasets simulated with the OU process,  
494 the diversity-dependent exponential ( $DD_{exp}$ , see Box 1) model with biogeography was the best-fit  
495 model, and similarly a model with a linear relationship between evolutionary rates and the  
496 number of sympatric taxa often fit sister-taxa datasets, though with much lower power overall

497 **Table 1.** Summary of the statistical properties of the analytical approaches tested under scenarios using data from all tips (i.e., with  
 498 sister-taxa analyses excluded). Values refer to the range of type I error rates and power levels for each tree size  $\geq 50$ , averaged across  
 499 biogeographic scenarios and scenarios where  $\psi$  or  $\psi_{nf} = 0$  or 2. Power refers to only those statistically significant tests in the  
 500 appropriate tail (i.e., in the lower tail for divergent character displacement and upper tail for convergent character displacement). For  
 501 each analytical scenario, the cell with the method with the best trade-off between Type I error and power is highlighted.

502

| Analysis                      | non-phylogenetic regression |              | Mantel test   |              | pppMantel test |              | PLMM          |              | simulation test |              | process-based models |                          |
|-------------------------------|-----------------------------|--------------|---------------|--------------|----------------|--------------|---------------|--------------|-----------------|--------------|----------------------|--------------------------|
|                               | <i>type I</i>               | <i>power</i> | <i>type I</i> | <i>power</i> | <i>type I</i>  | <i>power</i> | <i>type I</i> | <i>power</i> | <i>type I</i>   | <i>power</i> | <i>type I*</i>       | <i>power<sup>†</sup></i> |
| divergent char. displacement  | 0.37-0.61                   | 0.51-1       | 0.05-0.10     | 0.29-1       | 0.04-0.06      | 0.19-1       | 0.05-0.06     | 0.12-1       | 0.05-0.07       | 0.08-1       | 0.04-0.05            | 0.91-0.94                |
| convergent char. displacement | 0.40-0.60                   | 0.31-0.99    | 0.08-0.09     | 0-0.02       | 0.05-0.06      | 0-0.01       | 0.05-0.07     | 0.07-0.26    | 0.04-0.05       | 0.12-0.91    | --                   | --                       |
| predicting spp. interactions  | 0.08-0.3                    | 1            | --            | --           | --             | --           | 0.07-18       | 1            | 0.03-0.04       | 1            | --                   | --                       |

503 \*Type I error rate calculated as the proportion of datasets simulated without divergence for which a model that includes species interaction—  $DD_{exp}$ ,  $DD_{lin}$ , or MC—was chosen by  
 504 model selection (i.e., for which  $\Delta AICc = 0$  and  $\Delta AICc$  for all other models  $> 2$ ).

505 <sup>†</sup> Power calculated as the proportion of datasets simulated with divergence for which either  $DD_{exp}$ ,  $DD_{lin}$ , or MC was chosen by model selection.

506

507

508 **Table 2.** Summary of the statistical properties of the analytical approaches tested under scenarios using sister-taxa analyses. Values  
509 refer to the range of type I error rates and power levels, averaged across biogeographic scenarios and scenarios where  $\psi$  or  $\psi_{nf} = 0$  or  
510 2. Power refers to only those statistically significant tests in the appropriate tail (i.e., in the upper tail for divergent character  
511 displacement and lower tail for convergent character displacement). We caution against using sister-taxa approaches to test for  
512 character displacement.  
513

| Analysis                      | non-phylogenetic regression |              | sister-taxa GLM |              | PLMM          |              | simulation test |              | process-based models in EvoRAG |                          |
|-------------------------------|-----------------------------|--------------|-----------------|--------------|---------------|--------------|-----------------|--------------|--------------------------------|--------------------------|
|                               | <i>type I</i>               | <i>power</i> | <i>type I</i>   | <i>power</i> | <i>type I</i> | <i>power</i> | <i>type I</i>   | <i>power</i> | <i>type I*</i>                 | <i>power<sup>†</sup></i> |
| divergent char. displacement  | 0.07-0.42                   | 0.68-0.75    | 0.05-0.07       | 0.20-0.34    | 0.08-0.50     | 0.70-0.78    | 0.01-0.02       | 0.18-0.31    | 0.04-0.07                      | 0.03-0.36                |
| convergent char. displacement | 0.33-0.43                   | 0.01-0.2     | 0.07            | 0.04-0.06    | 0.41-0.5      | 0.02-0.21    | 0.03            | 0.01-0.2     | 0.04                           | 0.09-0.55                |

514 \*Type I error rate calculated as the proportion of datasets simulated without divergence for which a model that includes a linear dependency on the number of sympatric lineages—  
515  $BM_{linear}$  or  $OU_{linear\_beta}$ —was chosen by model selection (i.e., for which  $\Delta AICc = 0$  and  $\Delta AICc$  for all other models  $> 2$ ).  
516 <sup>†</sup> Power calculated as the proportion of datasets simulated with divergence for which either  $BM_{linear}$  or  $OU_{linear\_beta}$  was chosen by model selection.

517  
518

519 (Fig S4, Table 2). In the  $DD_{exp}$  model, rates of trait evolution vary exponentially with the  
520 number of sympatric lineages through time, so incorporating the effect of interspecific  
521 interactions on the rate of trait of evolution but not explicitly modeling the process of character  
522 displacement acting on the mean trait values. It may nonetheless provide a useful proxy for  
523 detecting patterns that are similar to those left by character displacement, in the absence of a  
524 process-based model that incorporates both attraction toward an optimum trait value and  
525 divergent character displacement. We emphasize, however, that statistical support for the  $DD_{exp}$   
526 model does not in itself constitute decisive evidence that character displacement has occurred, as  
527 other processes may generate increasing evolutionary rates with increasing lineage diversity.  
528 Given that the  $DD_{exp}$  model is the best-fit model in parameter space where other methods also  
529 perform well, combined evidence from model-fitting and other, non-process based methods  
530 would constitute a strong case for the presence of character displacement. In the absence of tip  
531 data (e.g., due to incomplete sampling or traits that are inherently measured as pairwise  
532 properties), process-based models are unsuitable and we recommend using data from as many  
533 species pairs as possible—not just sister taxa—and using simulation approaches or PLMMs. In  
534 other words, to detect divergent character displacement, we recommend that empiricists fit the  
535 MC model to their dataset when possible. High support for the MC model would constitute  
536 evidence that character displacement has acted on a trait. If the MC model does not provide a  
537 good fit for the data, this could be because character displacement proceeds in the presence of  
538 bounded trait evolution, in which case a signature of the  $DD_{exp}$  model with a positive rate  
539 parameter and/or a signature of sympatric divergence in phylogenetic simulations or PLMMs  
540 would constitute evidence consistent with divergent character displacement.

541            Interestingly, even though most previous investigators have used the  $DD_{exp}$  model to  
542 represent a decline in ecological opportunity with increasing species richness (Mahler et al.  
543 2010; Weir and Mursleen 2013), the maximum likelihood estimates of the rate parameters for  
544 this model were positive, rather than negative, when both divergence and the OU process were  
545 present (Fig. S9). This is consistent with our finding of increasing evolutionary rates with  
546 increasing species richness (Figs. S3, S4, S7) in this scenario. An increase in the rate of  
547 evolutionary changes in trait values toward the present likely results from selection not only  
548 restricting species to certain trait space but also partitioning that space. The resulting adaptive  
549 landscape is therefore rapidly changing, causing accelerating evolutionary rates as lineages fill  
550 this increasingly constrained space.

551            The MC model (Box 1) is similar to the model used to simulate data (Eq. 1), with the  
552 assumption that  $\alpha$  is very small ( $\ll 1$ ) and consequently, competitive interactions are affected by  
553 the mean trait values of all sympatric species, rather than by pairwise similarity (Nuismer and  
554 Harmon 2015; Drury et al. 2016). Biologists, however, generally assume that competition is  
555 stronger between phenotypically similar species (Brown and Wilson 1956). Our results show that  
556 the assumption of a small  $\alpha$  does not render the MC model useless for studying character  
557 displacement, as the MC model is the best-fit model for many datasets simulated under the  
558 character displacement model used here. Nevertheless, the finding that the  $DD_{exp}$  model is the  
559 best-fit model in datasets simulated under character displacement including OU indicates that the  
560 MC model is not a perfect model of character displacement. Recently, approximate Bayesian  
561 computational (ABC) tools have been published to fit a model of character displacement in  
562 which, like in our simulation model, the strength of competition depends on similarity in trait  
563 space (Clarke et al. 2017). This model provides an alternative tool for detecting character



564 displacement in comparative datasets, and we hope that further development of methods such as  
565 this ABC method will help ameliorate the statistical issues shown here.

566 For datasets simulated including the OU process, the ratio of the pull-parameter in the  
567 OU portion of the model to the maximum amount of repulsion ( $\psi:m$ ) had a consistent impact  
568 across all methods, which results from the overall larger magnitude of evolutionary changes in  
569 traits in scenarios with a high  $\psi:m$  ratio (Figs. S3, S4, S7). As  $\psi:m$  approached 1, all methods  
570 were better at detecting character displacement. Currently, there are no analytical approaches that  
571 can disentangle the simultaneous impact of attraction toward a peak and divergence due to  
572 competition, though we hope our results will inspire development of such tools.

573 Unlike for divergent character displacement, available statistical methods for detecting  
574 convergence in comparative datasets generally do a poor job of detecting convergence, with the  
575 simulation method outperforming others (Table 1). With whole-dataset approaches, Type I error  
576 rates are acceptable for phylogenetic analyses (~5%), however, so although detecting  
577 convergence is difficult, the risk of mistakenly detecting convergence is low. In sister-taxa  
578 analyses, although Type I error rates are high for PLMMs (Table 2), these largely return  
579 erroneous divergence results, rather than erroneous convergence (Figs. 4Bii,v, S12Bii,v). In  
580 short, if an empiricist detects convergence in their dataset, they can be fairly confident in the  
581 result. Yet if empiricists do not detect convergence, this could simply be a result of lower power  
582 of the available analytical tools. Currently, there are no tools to fit phylogenetic trait models of  
583 convergence between species (e.g., Nuismer & Harmon 2015); such tools might more  
584 successfully identify convergent character displacement in comparative datasets than the  
585 available statistical methods.

586 For both divergent and convergent character displacement scenarios, we found that sister-  
587 taxa GLMs and the simulation approach had a mean Type I error rate near 5% (Table 2).  
588 However, in some scenarios, the Type I error for sister taxa GLMs was much higher than for the  
589 simulation approach (Figs. 2Bi, 4Bi, Supplementary Tables), which suggests that including a  
590 model-based estimate of the rate of trait evolution more properly accounts for the effect of  
591 divergence than simply including the branch lengths separating sister taxa as a covariate in  
592 analyses to control for variation in the amount of time sister taxa have had to diverge from one  
593 another. The high overall Type I error rate for sister-taxa analyses may also result from the  
594 unrealistic assumption that transitions between allopatry and sympatry are uncommon along  
595 branches connecting sister taxa (Weir and Price 2011; Tobias et al. 2014). Supporting this  
596 explanation, we found that biogeographic scenarios with high levels of sympatric speciation and  
597 low dispersal tended to have overall lower Type I error rates (cf. Figs. 2,S2; Figs. 4,S12).

598 The outlook for identifying which traits drive species interaction is brighter. The  
599 statistical methods available to test for causal relationships between phenotypic similarity and  
600 interactions between species have very high power. The simulation approach has a low Type I  
601 error rate when causal relationships are simulated based on an unmeasured trait, although non-  
602 phylogenetic regressions and PLMMs suffer from relatively high Type I error rates (Table 1).  
603 Thus, we recommend that empiricists interested in predicting pairwise species interactions based  
604 on trait data use phylogenetic simulations. While we did not simulate interactions between  
605 clades, our results are likely applicable to other empirical questions, such as identifying traits that  
606 predict links in ecological networks (Rafferty and Ives 2013; Hadfield et al. 2014; Eklöf and  
607 Stouffer 2016).

608 By simulating datasets with various types of interactions between species across different  
609 modes of speciation and dispersal rates, we have shown that many of the methods that  
610 investigators use to analyze empirical datasets have low power to detect such patterns (Table 1).  
611 Worse still, widely-used sister taxa approaches, including standard regressions and sister-taxa  
612 GLMs, often detected character displacement in datasets that were simulated under a simple BM  
613 model (Figs. 2Bi-ii, 4Bi-ii). We therefore urge investigators to use caution when interpreting the  
614 results of such analyses, even in cases when sympatry is delineated using other criteria than the  
615 one considered here. When process-based models could be fit to these datasets, they tended to  
616 consistently identify patterns of divergence (i.e., either the matching competition model or a  
617 diversity-dependent model is the best fit model >91% of the time). Thus, when possible,  
618 empiricists should employ such methods. Statistical tools to fit process-based models of  
619 phenotypic evolution including species interactions are in their infancy (Drury et al. 2016;  
620 Manceau et al. 2017) and many possible models are not yet available (e.g., convergent character  
621 displacement, character divergence in the presence of an adaptive pull towards a peak). We hope  
622 that our results encourage the continued development of such tools.

623 In closing, we note that divergent character displacement is erroneously detected with  
624 many statistical approaches, indicating that there may be an overrepresentation of empirical  
625 studies that imply that divergence has occurred. In particular, studies that have used sister-taxa  
626 methods to document character displacement may have falsely interpreted a null expectation—  
627 larger trait differences between sympatric lineages owing to allopatric speciation—as evidence  
628 for divergent character displacement. Conversely, convergent character displacement is often  
629 hard to detect with existing methods, suggesting that convergence in signal traits (e.g., Cody

630 1969, 1973; Tobias et al. 2014; Losin et al. 2016) might be more prevalent than previously  
631 thought.

632

633 **ACKNOWLEDGEMENTS**

634

635 This research was funded by the European Research Council (grant 616419-PANDA to HM) and  
636 the National Science Foundation (grant DEB-1457844 to GFG). We thank M. Manceau, J.  
637 Clavel, E. Lewitus, O. Maliet, and O. Missa for feedback and F. Hartig for assistance  
638 streamlining our simulation script.

639 **REFERENCES**

- 640 Allen W.L., Stevens M., Higham J.P. 2014. Character displacement of Cercopithecini primate  
641 visual signals. *Nat. Commun.* 5:4266.
- 642 Bacquet P.M.B., Brattström O., Wang H.L., Allen C.E., Löfstedt C., Brakefield P.M.,  
643 Nieberding C.M. 2015. Selection on male sex pheromone composition contributes to  
644 butterfly reproductive isolation. *Proc. R. Soc. London B Biol. Sci.* 282:20142734.
- 645 Bothwell E., Montgomerie R., Loughheed S.C., Martin P.R. 2015. Closely related species of birds  
646 differ more in body size when their ranges overlap — in warm , but not cool , climates.  
647 *Evolution.* 69:1701–1712.
- 648 Brown W.L.L., Wilson E.O. 1956. Character displacement. *Syst. Zool.* 5:49–64.
- 649 Cadotte M., Albert C.H., Walker S.C. 2013. The ecology of differences: Assessing community  
650 assembly with trait and evolutionary distances. *Ecol. Lett.* 16:1234–1244.
- 651 Cavender-Bares J., Kozak K.H., Fine P.V.A., Kembel S.W. 2009. The merging of community  
652 ecology and phylogenetic biology. *Ecol. Lett.* 12:693–715.
- 653 Clarke M., Thomas G.H., Freckleton R.P. 2017. Trait evolution in adaptive radiations: modelling  
654 and measuring interspecific competition on phylogenies. *Am. Nat.* 189:doi:  
655 10.1086/689819.
- 656 Cody M.L. 1969. Convergent characteristics in sympatric species: a possible relation to  
657 interspecific competition and aggression. *Condor.* 71:223–239.
- 658 Cody M.L. 1973. Character Convergence. *Annu. Rev. Ecol. Syst.* 4:189–211.
- 659 Davies J.T., Meiri S., Barraclough T.G., Gittleman J.L. 2007. Species co-existence and character  
660 divergence across carnivores. *Ecol. Lett.* 10:146–152.
- 661 Drury J., Clavel J., Manceau M., Morlon H. 2016. Estimating the effect of competition on trait

- 662 evolution using maximum likelihood inference. *Syst. Biol.* 65:700–710.
- 663 Drury J.P., Okamoto K.W., Anderson C.N., Grether G.F. 2015. Reproductive interference  
664 explains persistence of aggression between species. *Proc. R. Soc. B.* 282:20142256.
- 665 Eklöf A., Stouffer D.B. 2016. The phylogenetic component of food web structure and intervality.  
666 *Theor. Ecol.* 9:107–115.
- 667 Elias M., Gompert Z., Jiggins C., Willmott K. 2008. Mutualistic interactions drive ecological  
668 niche convergence in a diverse butterfly community. *PLoS Biol.* 6:e300.
- 669 Felsenstein J. 1985. Phylogenies and the comparative method. *Am. Nat.* 125:1–15.
- 670 Felsenstein J. 1988. Phylogenies and quantitative characters. *Annu. Rev. Ecol. Syst.* 19:445–471.
- 671 Garland T., Dickerman A.W., Janis C.M., Jones J.A. 1993. Phylogenetic analysis of covariance  
672 by computer simulation. *Syst. Biol.* 42:265–292.
- 673 Grant P.R. 1972. Convergent and divergent character displacement. *Biol. J. Linn. Soc.* 4:39–68.
- 674 Grant P.R., Grant B.R. 2006. Evolution of character displacement in Darwin’s finches. *Science.*  
675 313:224–226.
- 676 Grant P.R., Grant B.R. 2011. *How and Why Species Multiply: the Radiation of Darwin’s*  
677 *Finches.* Princeton, NJ: Princeton University Press.
- 678 Grether G.F., Anderson C.N., Drury J.P., Kirschel A.N.G., Losin N., Okamoto K., Peiman K.S.  
679 2013. The evolutionary consequences of interspecific aggression. *Ann. N. Y. Acad. Sci.*  
680 1289:48–68.
- 681 Grether G.F., Losin N., Anderson C.N., Okamoto K. 2009. The role of interspecific interference  
682 competition in character displacement and the evolution of competitor recognition. *Biol.*  
683 *Rev.* 84:617–635.
- 684 Guillot G., Rousset F. 2013. Dismantling the Mantel tests. *Methods Ecol. Evol.* 4:336–344.

- 685 Hadfield J.D., Krasnov B.R., Poulin R., Nakagawa S. 2014. A tale of two phylogenies:  
686 comparative analyses of ecological interactions. *Am. Nat.* 183:174–187.
- 687 Hadfield J.D., Nakagawa S. 2010. General quantitative genetic methods for comparative biology:  
688 phylogenies, taxonomies and multi-trait models for continuous and categorical characters. *J.*  
689 *Evol. Biol.* 23:494–508.
- 690 Hansen T.F., Martins E.P. 1996. Translating between microevolutionary process and  
691 macroevolutionary patterns: The correlation structure of interspecific data. *Evolution.*  
692 50:1404–1417.
- 693 Harmon L.J., Glor R.E. 2010. Poor statistical performance of the Mantel test in phylogenetic  
694 comparative analyses. *Evolution.* 64:2173–2178.
- 695 Harmon L.J., Losos J.B., Jonathan Davies T., Gillespie R.G., Gittleman J.L., Bryan Jennings W.,  
696 Kozak K.H., McPeck M.A., Moreno-Roark F., Near T.J., Purvis A., Ricklefs R.E., Schluter  
697 D., Schulte J.A., Seehausen O., Sidlauskas B.L., Torres-Carvajal O., Weir J.T., Mooers  
698 A.T. 2010. Early bursts of body size and shape evolution are rare in comparative data.  
699 *Evolution.* 64:2385–2396.
- 700 Hilbe J.M. 2009. Logistic regression models. CRC press.
- 701 Lapointe F.J., Garland T. 2001. A generalized permutation model for the analysis of cross-  
702 species data. *J. Classif.* 18:109–127.
- 703 Losin N., Drury J.P., Peiman K.S., Storch C., Grether G.F. 2016. The ecological and  
704 evolutionary stability of interspecific territoriality. *Ecol. Lett.* 19:260–267.
- 705 Mahler D.L., Revell L.J., Glor R.E., Losos J.B. 2010. Ecological opportunity and the rate of  
706 morphological evolution in the diversification of greater Antillean anoles. *Evolution.*  
707 64:2731–2745.

- 708 Manceau M., Lambert A., Morlon H. 2017. A unifying comparative phylogenetic framework  
709 including traits coevolving across interacting lineages. *Syst.*  
710 *Biol.*:<https://doi.org/10.1093/sysbio/syw115>.
- 711 Mantel N. 1967. The detection of disease clustering and a generalized regression approach.  
712 *Cancer Res.* 27:209–220.
- 713 Martin P.R., Montgomerie R., Loughheed S.C. 2010. Rapid sympatry explains greater color  
714 pattern divergence in high latitude birds. *Evolution.* 64:336–347.
- 715 Martin P.R., Montgomerie R., Loughheed S.C. 2015. Color patterns of closely related bird species  
716 are more divergent at intermediate levels of breeding-range sympatry. *Am. Nat.* 185:443–  
717 451.
- 718 Martins E.P., Garland Jr T. 1991. Phylogenetic analyses of the correlated evolution of continuous  
719 characters: a simulation study. *Evolution.* 45:534–557.
- 720 Matzke N.J. 2014. Model selection in historical biogeography reveals that founder-event  
721 speciation is a crucial process in island clades. *Syst. Biol.* 63:951–970.
- 722 Medina-García A., Araya-Salas M., Wright T.F. 2015. Does vocal learning accelerate acoustic  
723 diversification? Evolution of contact calls in Neotropical parrots. *J. Evol. Biol.* 28:1782–  
724 1792.
- 725 Morlon H., Lewitus E., Condamine F.L., Manceau M., Clavel J., Drury J. 2016. RPANDA: an R  
726 package for macroevolutionary analyses on phylogenetic trees. *Methods Ecol. Evol.* 7:589–  
727 597.
- 728 Nuismer S.L., Harmon L.J. 2015. Predicting rates of interspecific interaction from phylogenetic  
729 trees. *Ecol. Lett.* 18:17–27.
- 730 Pennell M.W., Eastman J.M., Slater G.J., Brown J.W., Uyeda J.C., FitzJohn R.G., Alfaro M.E.,



- 731 Harmon L.J. 2014. geiger v2. 0: an expanded suite of methods for fitting macroevolutionary  
732 models to phylogenetic trees. *Bioinformatics*. 30:2216–2218.
- 733 Pfennig K.S., Pfennig D.W. 2009. Character displacement: Ecological and reproductive  
734 responses to a common evolutionary problem. *Q. Rev. Biol.* 84:253–276.
- 735 Pigot A.L., Tobias J.A. 2014. Dispersal and the transition to sympatry in vertebrates. *Proc. R.*  
736 *Soc. B Biol. Sci.* 282:20141929.
- 737 Rafferty N.E., Ives A.R. 2013. Phylogenetic trait-based analyses of ecological networks.  
738 *Ecology*. 94:2321–2333.
- 739 Ree R.H., Smith S.A. 2008. Maximum likelihood inference of geographic range evolution by  
740 dispersal, local extinction, and cladogenesis. *Syst. Biol.* 57:4–14.
- 741 Rezende E.L., Diniz-Filho J.A.F. 2012. Phylogenetic analyses: Comparing species to infer  
742 adaptations and physiological mechanisms. *Compr. Physiol.* 2:639–674.
- 743 Rezende E.L., Lavabre J.E., Guimaraes Jr. P.R., Jordano P., Bascompte J. 2007. Non-random  
744 coextinctions in phylogenetically structured mutualistic networks. *Nature*. 448:925–929.
- 745 Roncal J., Henderson A., Borchsenius F., Cardoso S.R.S., Balslev H. 2012. Can phylogenetic  
746 signal, character displacement, or random phenotypic drift explain the morphological  
747 variation in the genus *Geonoma* (Arecaceae)? *Biol. J. Linn. Soc.* 106:528–539.
- 748 Schluter D. 2000. *The Ecology of Adaptive Radiation*. Oxford, UK: Oxford University Press.
- 749 Seddon N., Botero C.A., Tobias J.A., Dunn P.O., Macgregor H.E., Rubenstein D.R., Uy J.A.,  
750 Weir J.T., Whittingham L.A., Safran R.J. 2013. Sexual selection accelerates signal  
751 evolution during speciation in birds. *Proc. R. Soc. B Biol. Sci.* 280:20131065.
- 752 Tobias J.A., Cornwallis C.K., Derryberry E.P., Claramunt S., Brumfield R.T., Seddon N. 2014.  
753 Species coexistence and the dynamics of phenotypic evolution in adaptive radiation. *Nature*.

- 754           506:359–363.
- 755   de Villemereuil P., Nakagawa S. 2014. General quantitative genetic methods for comparative  
756           biology. *Modern Phylogenetic Comparative Methods and Their Application in Evolutionary*  
757           *Biology*. Springer. p. 287–303.
- 758   Webb C.O., Ackerly D.D., McPeck M.A., Donoghue M.J. 2002. Phylogenies and community  
759           ecology. *Annu. Rev. Ecol. Syst.*:475–505.
- 760   Weber M.G., Mitko L., Eltz T., Ramírez S.R. 2016. Macroevolution of perfume signalling in  
761           orchid bees. *Ecol. Lett.*
- 762   Weir J.T., Lawson A. 2015. Evolutionary rates across gradients. *Methods Ecol. Evol.* 6:1278–  
763           1286.
- 764   Weir J.T., Mursleen S. 2013. Diversity-dependent cladogenesis and trait evolution in the  
765           adaptive radiation of the auks (Aves: Alcidae). *Evolution*. 67:403–416.
- 766   Weir J.T., Price T.D. 2011. Limits to speciation inferred from times to secondary sympatry and  
767           ages of hybridizing species along a latitudinal gradient. *Am. Nat.* 177:462–469.
- 768   Weir J.T., Wheatcroft D. 2011. A latitudinal gradient in rates of evolution of avian syllable  
769           diversity and song length. *Proc. R. Soc. B Biol. Sci.* 278:1713–20.
- 770   Willis P.M., Symula R.E., Lovette I.J. 2014. Ecology, song similarity and phylogeny predict  
771           natural hybridization in an avian family. *Evol. Ecol.* 28:299–322.
- 772
- 773

774 **Box 1. Methods for assessing the interplay between interspecific interactions and species**  
775 **phenotypes**

776  
777 Comparative analyses of the interplay between interspecific interactions and species  
778 phenotypes can either be conducted on entire clades, or, commonly, on sister taxa—species pairs  
779 that share a most recent common ancestor—that are culled from larger phylogenies. Such  
780 analyses generally consist of testing the statistical significance of correlations between either  
781 phenotypic similarity and geographic overlap (to test for divergent or convergent character  
782 displacement) or species interactions and phenotypic similarity (to find predictors of species  
783 interactions). As we are looking for correlations between pairwise comparisons (e.g., trait  
784 similarity, biogeographical overlap, hybridization, magnitude of pre-zygotic isolation), rather  
785 than “tip values” belonging to a single species, phylogenetically independent contrasts and  
786 extensions of PGLS analyses (Felsenstein 1985; Rezende and Diniz-Filho 2012) cannot be used,  
787 and alternative tests have been developed.

788  
789 *1. Non-phylogenetic regressions*

790 “Non-phylogenetic regressions” refers to Generalized Linear Models (GLMs) that ignore  
791 phylogenetic structure. Though less commonly applied to whole-clade analyses, investigators  
792 sometimes use non-phylogenetic regressions for sister-taxa analyses, on the basis that branches  
793 connecting sister taxa represent independent evolutionary histories (Felsenstein 1985).

794  
795 *2. Mantel tests*

796           Several previous investigators have implemented Mantel tests (Mantel 1967) in analyses  
797 of species-pair comparisons (e.g., Roncal *et al.* 2012). These tests are designed to assess  
798 correlations between matrices, which here comprise interspecific trait distances or differences.  
799 Existing accounts of Mantel tests describe procedures only for complete matrices, so they cannot  
800 be used in many cases, including sister-taxa analyses (for which most off-diagonal elements of  
801 distances matrices are by definition excluded) and in identifying predictors of species  
802 interactions (e.g., hybridization), as only sympatric lineages can interact and setting values for  
803 allopatric comparisons to zero would not make biological sense.

804

### 805 *3. Phylogenetically permuted partial Mantel tests*

806           Phylogenetically permuted partial Mantel (pppMantel) tests (Lapointe and Garland 2001)  
807 account for phylogenetic non-independence by permuting null datasets that are structured  
808 phylogenetically, and are popular among investigators studying species interactions (e.g., Allen  
809 *et al.* 2014; Willis *et al.* 2014; Medina-García *et al.* 2015). Like Mantel tests, pppMantel tests  
810 also require complete interaction matrices.

811

### 812 *4. Phylogenetic linear mixed models*

813           In recent years, researchers have adapted animal models from quantitative genetics to  
814 incorporate phylogenies as random effects in mixed-effect regressions on comparative datasets  
815 (Hadfield & Nakagawa 2010). Such phylogenetic linear mixed models (PLMMs) have been  
816 modified to accommodate pairwise species data (Tobias *et al.* 2014), wherein the identity of the  
817 species being compared and the node connecting them in the phylogeny are included as random

818 effects. PLMMs are promising new tools, as they are not limited to sister-taxa data and model  
819 predictions can be generated and plotted.

820

### 821 *5. Phylogenetic simulations*

822 Simulation approaches are widely used to control for phylogenetic non-independence in  
823 tip data (Martins & Garland Jr 1991; Garland *et al.* 1993), and have been applied to pairwise  
824 species comparisons (Elias *et al.* 2008; Drury *et al.* 2015; Losin *et al.* 2016). In these approaches,  
825 trait evolution is simulated along phylogenies, often scaled such that the simulated tip data  
826 resemble real data. Pairwise comparisons are then calculated on many simulated datasets and  
827 used to generate a phylogenetically informed null distribution of test statistics against which to  
828 compare test statistics calculated from the real data.

829

### 830 *6. Process-based models of phenotypic evolution*

831 In the statistical approaches outlined thus far, the data analyzed are measurements of  
832 pairwise differences between species, and the statistical tests for the effect of species interactions  
833 on trait evolution consist of testing for significant correlations between either phenotypic  
834 similarity and geographic overlap or species interactions and trait similarity. However, it is also  
835 possible to detect a signature of interspecific competition in the distributions of continuous trait  
836 values across the tips of a phylogeny by fitting process-based models of phenotypic evolution to  
837 the data. These models allow testing hypotheses about which processes are most likely to have  
838 generated the observed distribution of traits in a clade (Hansen & Martins 1996).

839 Interspecific interactions have recently been incorporated into such models in two ways.

840 First, in diversity-dependent (DD) models, evolutionary rates change as a function (either linear

841 [DD<sub>lin</sub>] or exponential [DD<sub>exp</sub>]) of the number of extant lineages through time (e.g., Weir &  
842 Mursleen 2013). Secondly, in the ‘matching competition’ (MC) model, trait evolution in an  
843 evolving lineage varies as a function of the values of traits in other evolving lineages (Nuismer &  
844 Harmon 2015, Drury *et al.* 2016). Comparing the fit of these models to other models that exclude  
845 interspecific interactions (e.g., Brownian motion and Ornstein-Uhlenbeck models) tests whether  
846 there is evidence that interspecific interactions have influenced the trajectory of trait evolution in  
847 a clade.

848

#### 849 7. *Sister-taxa GLMs*

850 If allopatric speciation is common, then sympatry occurs after a period of initial isolation,  
851 resulting in a pattern where sympatric sister taxa are older than allopatric sister taxa. Thus, even  
852 random genetic drift can generate a pattern in which sympatric lineages have more divergent  
853 traits compared to allopatric lineages, simply because divergence has had more time to evolve  
854 (Weir and Price 2011; Tobias *et al.* 2014). To control for variation in the evolutionary distance  
855 between sister taxa, “sister taxa GLMs” include patristic distance as a predictor in non-  
856 phylogenetic regressions (e.g., Davies *et al.* 2007; Martin *et al.* 2010).

857

#### 858 8. *Sister-taxa model fitting*

859 Recently, tools have been described for fitting process-based models to sister taxa  
860 datasets using maximum likelihood (Weir and Wheatcroft 2011; Weir and Lawson 2015). With  
861 these tools, it is possible to test whether models that allow evolutionary rates to vary as a linear  
862 function of a gradient (e.g., whether male plumage coloration varies as a function of the strength  
863 of sexual selection, Seddon *et al.* 2013) better fit sister-taxa datasets than constant rates models.

864 When the gradient is the number of sympatric lineages, these models are conceptually similar to  
865 the linear diversity dependent models described above.

**Supporting Information for “An assessment of phylogenetic tools for analyzing the interplay between interspecific interactions and phenotypic evolution”**

Drury, J.P., Grether, G.F., Garland, Jr., T., & Morlon, H.

1. Supplementary Methods
2. Supplementary Diagram 1
3. Supplementary Figures 1-17



## SUPPLEMENTARY METHODS

### *Simulating Phylogenies Under Varying Biogeographic Scenarios*

Joint simulation of trees and biogeographies requires parameterizing (1) the diversification process (the rules defining how new species appear), (2) rates of anagenetic range gains/losses (the rules defining how lineages' ranges change), and (3) cladogenetic range inheritance (the rules defining how two sister lineages divide their ancestral range upon speciation). In each scenario, we evolved species ranges under the DEC+J model (Matzke 2014) across a grid of ten possible regions with equal probability of transitions between regions and only one region occupied at the root of the tree. We simulated the diversification process along each tree with a rate of 0.25 (speciation/lineage/time unit). Anagenetic changes were simulated under two dispersal rates  $\{d$  (transition/lineage/unit time) = 0.03, 0.06 $\}$ , chosen from within a range of dispersal values estimated from empirical datasets. When anagenetic dispersal happens, a lineage occupies an additional region chosen at random. Across these two values of “ $d$ ”, we held local extirpation rates constant at  $e = 0.03$  (local extirpation/lineage/unit time), the median value used for simulations in Matzke 2014. In cases where a lineage occupying only one region goes locally extinct, that lineage goes extinct (Matzke 2014).

The cladogenetic events possible in the DEC+J model are—briefly (for a detailed explanation of each of these processes, see Matzke 2014)—sympatric speciation (both daughter lineages keep the one-region ancestral range, parameter “ $y$ ”), subset sympatric speciation (one of the daughter lineages keeps the ancestral range, the other one inherits a subset of the ancestral range, parameter “ $s$ ”), vicariance (the two daughter lineages split the ancestral range, parameter “ $v$ ”), and founder event speciation (one daughter lineage keeps the ancestral range, the other occupies a new region, parameter “ $j$ ”).

As the pool of possible daughter ranges changes depending on the ancestral range (e.g., there are fewer ways in which the ancestral two-region range “ $AB$ ” can be propagated to daughter lineages than the three-range region “ $ABC$ ”), cladogenetic range changes are sampled by first assigning each type of cladogenetic change ( $y, s, v$ , and  $j$  from above) a particular weight. From these weighted ranges, the probability that a daughter inherits a specific range is calculated by dividing the weight assigned to that range by the sum of the weights of each possible daughter range (Matzke 2014). By default, the relative weight of sympatric speciation (range copying), subset sympatric speciation, and vicariance are equal in most implementations of the DEC model (i.e.,  $y=s=v$ ). To generate biogeographic scenarios where recently diverged sister taxa are more likely to be allopatric, we implemented a scenario where the weight of either type of sympatric speciation event is very low  $\{y = s = 0.005*v\}$  as well as under default parameter values  $\{y = s = v\}$ . Across both scenarios, we held the relative weight of founder event speciation constant ( $j = 0.1, y + s + v = 2.9$ ).

### *Simulating Character Displacement*

Datasets were simulated under Eq. 1 in the main text as follows:

1. At the first time step (the root), the trait value was set to  $z_0$  (= 0 in all cases).
2. Each time step  $dt$  was set to the total tree height divided by 2500. To complete the simulation along any branch not divisible by this value of  $dt$ , we set the time step equal to the remainder of the branch length divided by  $dt$ .

3. During each time step from the root to the tip of the tree, the trait value of lineage  $i$  is calculated according to Eq 1. For the component of Eq.1 dictating the magnitude of divergence or convergence, between-lineage distances in trait space were calculated based on similarity at time  $t-dt$ . In simulations of divergent character displacement, if species have identical trait values, the “sign” value is overridden so that species move in the opposite direction of one another in trait space.
4. At a branching event, the trait values of both daughter lineages are set to equal the value of the parent lineage.

For divergent character displacement scenarios, we arbitrarily chose simulation parameter values based on visual inspection of simulated trajectories under different combinations of parameter values. We chose to focus on  $m = 2$ , and also explored the effect of varying this parameter between 1 & 10, because we could visualize divergence in the realized simulations. For example, for a 20 tip tree simulated with high dispersal and low sympatric speciation:

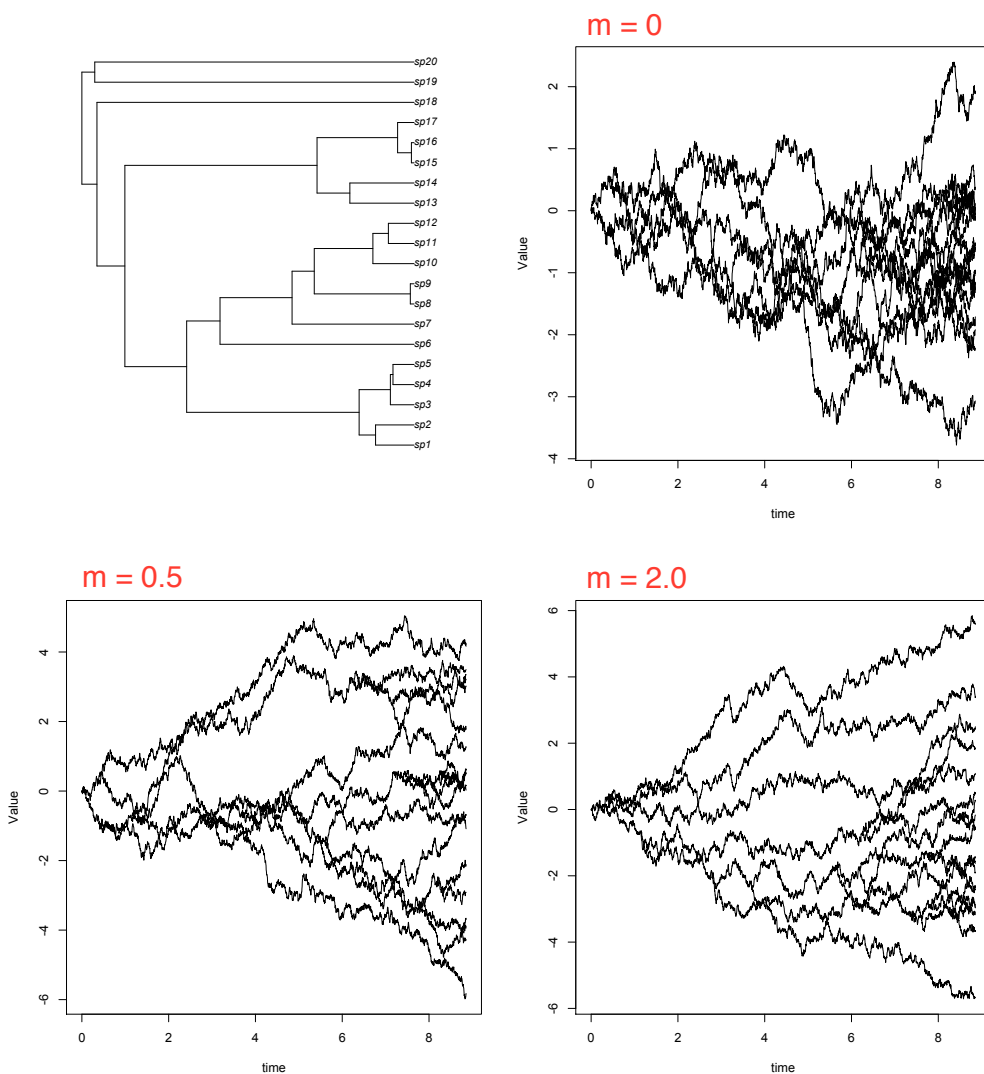

In convergent character displacement simulations, we likewise chose parameter values based on visual inspection of simulated trajectories under different combinations of parameter values. We chose to focus on  $m = -0.25$ , and also explored the effect of varying this parameter between  $-0.1$  &  $-0.50$ , because we could visualize convergence in the realized simulations and the simulated trait values did not converge across the entire clade. For example, on the same tree as above:

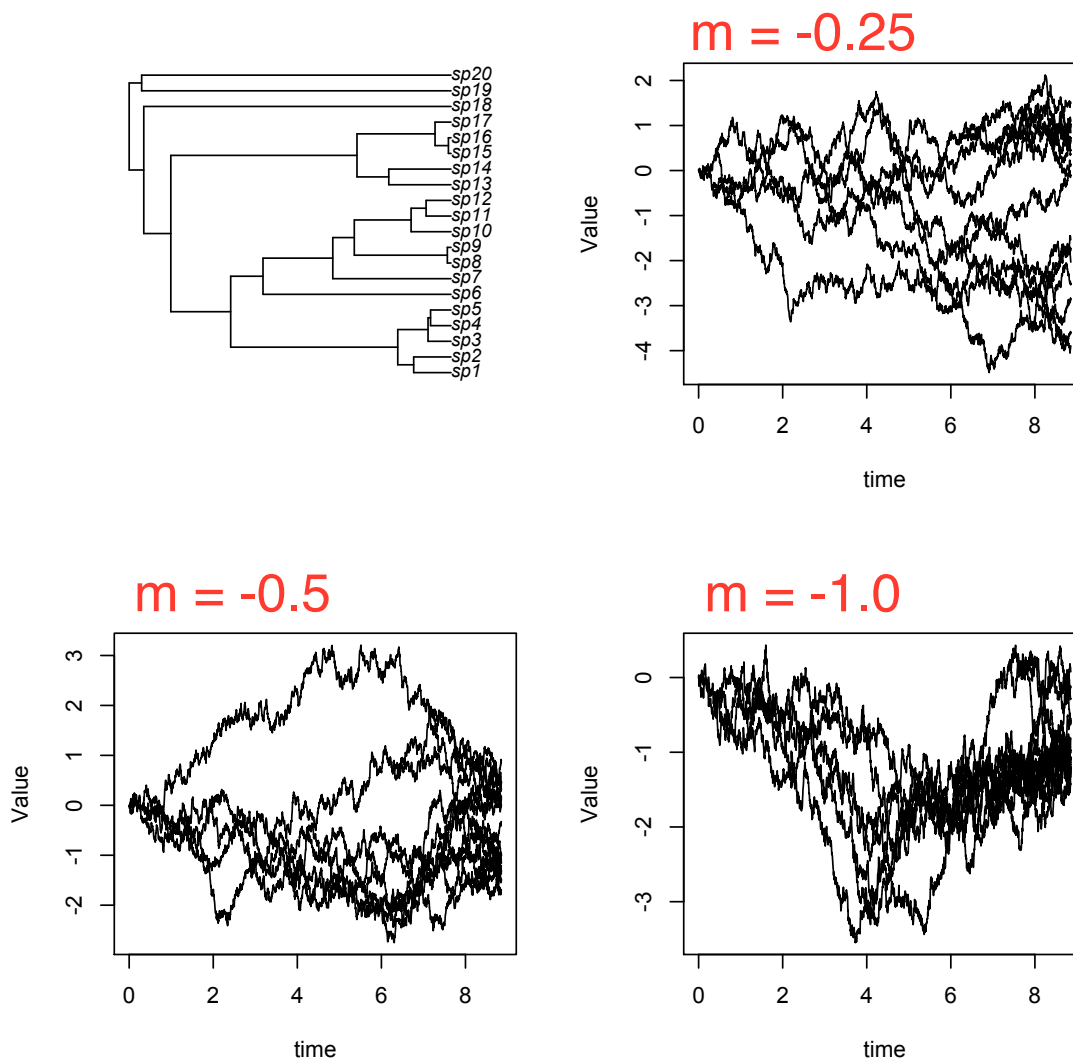

### *Analytical Methods*

Non-phylogenetic regressions: General Linear Models (GLMs) were fitted to simulated datasets using the `glm` function in R. For character displacement analyses, linear models were fit to pairwise differences in trait data, with sympatry/allopatry as the predictor variable. For interaction analyses, logistic regressions were fit to the simulated species interaction variable, with pairwise difference in the focal trait as the predictor variable.

Mantel tests: We computed raw Mantel tests using `mantel.rtest` in `ade4` (Dray and Dufour 2007), specifying 1000 permutations to assess statistical significance. We computed phylogenetically permuted partial Mantel (`pppMantel`) tests (Lapointe and Garland 2001) using the script `phyloMantel.R` from Harmon & Glor (2010), again using 1000 permutations to test for significance.

Phylogenetic linear mixed models (PLMMs): For the character displacement datasets, we fitted PLMMs using `asreml-R` (Butler et al. 2009), including both sympatry and the patristic distance (calculated using the `cophenetic.phylo` function in `ape` [Paradis 2011]) between each pairwise species comparison as fixed effects and including the identity of each lineage and the phylogeny as random effects, following Tobias *et al.* (2014). To assess statistical significance of the fixed effects, we used Wald-type F-tests with Kenward-Rogers adjustments to the denominator degrees of freedom using the `wald.asreml` function with the option `denDF = "numeric"` in `asreml-R`, again following Tobias *et al.* (2014)

For the scenario using traits to predict species interactions, we fit PLMMs using `MCMCglmm` in R (Hadfield 2010), because the residual maximum likelihood approach used in `asreml-R` may bias estimates for logistic regressions (Bolker et al. 2009). We used standard inverse-Gamma priors for the fixed and random effects, using the code:

```
prior<-list(G=list(G1=list(V=1,nu=0.002),G2=list(V=1,nu=0.002),G3=list(V=1,nu=0.002)),R=list(V=1,nu=0.02))
```

We ran each fit for between 2 million and 20 million chains based on preliminary assessment of convergence for different tree sizes, varying the burn-in and thinning periods to result in approximately 2000 runs. We visually inspected convergence for a large sample of model fits to make sure that our MCMC parameterization was working well. MCMC fits were very computationally expensive, so we fit the models to a subset of simulated datasets ( $n = 100$  per tree size, biogeography, and simulation parameter combination).

For all PLMMs, we randomized the order in which the identity of the lineages was passed to the random effects.

Simulation approach: BM models were first fit to simulated trait data using `mvBM` in the `mvMORPH` package (Clavel et al. 2015). Then, 5,000 datasets were simulated using the maximum likelihood estimate of the BM rate parameter and state at the root using `fastBM` in `phytools` (Revell 2012). A GLM (as outlined in “non-phylogenetic regressions”, the predictor variable for character displacement analyses was biogeographical overlap and the response variable was pairwise trait similarity, and for analyses of species interactions, the pairwise trait similarity was the predictor variable and a binomial variable of species interaction was the response variable) was fit to each of these simulated datasets, and the resulting analysis was considered statistically significant if both (a) the non-phylogenetic test on the raw data was statistically significant and (b) the test statistic from the raw analysis was outside of the 2.5-97.5% quantile interval of test statistics estimated on the simulated datasets.

Sister taxa analyses: for trees of size 150 and larger, we culled sister taxa from the full trees. We then ran non-phylogenetic regressions, PLMMs, the simulation approach and sister taxa GLMs on the culled dataset.

Phenotypic models: We fit all phenotypic models by maximum likelihood. We fit BM and OU models using *geiger* (Pennell et al. 2014) and the matching competition and two diversity dependent models (with either linear or exponential dependence of sigma on the number of species) using RPANDA (Morlon et al. 2016) in R. For the latter models, we included the biogeography used to simulate the datasets in the model fits, as described in Drury *et al.* (2016). We then compared the relative support of these models using Akaike weights (Burnham and Anderson 2002), since the models are not nested. Since model-fitting is computationally expensive, we fit the process-based models to a subset of datasets simulated on 100 tip trees ( $n = 100$  biogeography and simulation parameter combination).

Additionally, to analyze the effect of  $m$  and  $\psi$  on rates of evolution, we fit four trait models to the sister-taxa datasets for both divergent and convergent character displacement scenarios using the R package EvoRAG (Weir and Lawson 2015): BM, OU, plus versions of BM and OU that allow the rate of trait evolution to change with the number of sympatric lineages (i.e., “BM\_null”, “OU\_null”, “BM\_linear”, and “OU\_linear\_beta”).

## SUPPLEMENTARY REFERENCES

- Bolker, B. M., M. E. Brooks, C. J. Clark, S. W. Geange, J. R. Poulsen, M. H. H. Stevens, and J.-S. S. White. 2009. Generalized linear mixed models: a practical guide for ecology and evolution. *Trends Ecol. Evol.* 24:127–135. Elsevier.
- Burnham, K. P., and D. R. Anderson. 2002. Model selection and multimodel inference: a practical information-theoretic approach. 2nd editio. Springer, New York, NY.
- Butler, D., B. Cullis, A. Gilmour, and B. Gogel. 2009. ASReml user guide release 3.0. VSN Int. Ltd, Hemel Hempstead, UK.
- Clavel, J., G. Escarguel, and G. Merceron. 2015. mvMORPH: an R package for fitting multivariate evolutionary models to morphometric data. *Methods Ecol. Evol.* 6:1311–1319. Wiley Online Library.
- Dray, S., and A. B. Dufour. 2007. The ade4 package: implementing the duality diagram for ecologists. *J. Stat. Softw.* 22:1–20.
- Drury, J., J. Clavel, M. Manceau, and H. Morlon. 2016. Estimating the effect of competition on trait evolution using maximum likelihood inference. *Syst. Biol.* 65:700–710.
- Hadfield, J. D. 2010. MCMC methods for multi-response generalized linear mixed models: the MCMCglmm R package. *J. Stat. Softw.* 33:1–22.
- Harmon, L. J., and R. E. Glor. 2010. Poor statistical performance of the Mantel test in phylogenetic comparative analyses. *Evolution (N. Y.)* 64:2173–2178.
- Lapointe, F. J., and T. Garland. 2001. A generalized permutation model for the analysis of cross-species data. *J. Classif.* 18:109–127. Springer.
- Matzke, N. J. 2014. Model selection in historical biogeography reveals that founder-event speciation is a crucial process in island clades. *Syst. Biol.* 63:951–970.
- Morlon, H., E. Lewitus, F. L. Condamine, M. Manceau, J. Clavel, and J. Drury. 2016. RPANDA: an R package for macroevolutionary analyses on phylogenetic trees. *Methods Ecol. Evol.* 7:589–597. Wiley Online Library.
- Paradis, E. 2011. *Analysis of Phylogenetics and Evolution with R*. Springer, New York, NY.
- Pennell, M. W., J. M. Eastman, G. J. Slater, J. W. Brown, J. C. Uyeda, R. G. FitzJohn, M. E. Alfaro, and L. J. Harmon. 2014. geiger v2. 0: an expanded suite of methods for fitting macroevolutionary models to phylogenetic trees. *Bioinformatics* btu181. Oxford Univ Press.
- Revell, L. J. 2012. phytools: An R package for phylogenetic comparative biology (and other things). *Methods Ecol. Evol.* 3:217–223.
- Tobias, J. A., C. K. Cornwallis, E. P. Derryberry, S. Claramunt, R. T. Brumfield, and N. Seddon. 2014. Species coexistence and the dynamics of phenotypic evolution in adaptive radiation. *Nature* 506:359–363. Nature Publishing Group.
- Weir, J. T., and A. Lawson. 2015. Evolutionary rates across gradients. *Methods Ecol. Evol.* 6:1278–1286.

**Supplementary Diagram 1.** Analytical methods used for each simulation scenario (see Box 1 for more details).

| analytical method                                  | divergent character displacement |             | convergent character displacement |             | predicting spp. interactions |
|----------------------------------------------------|----------------------------------|-------------|-----------------------------------|-------------|------------------------------|
|                                                    | whole tree                       | sister taxa | whole tree                        | sister taxa | sympatric spp.               |
| (1) non-phylogenetic regression                    | ✓                                | ✓           | ✓                                 | ✓           | ✓                            |
| (2) Mantel test                                    | ✓                                |             | ✓                                 |             |                              |
| (3) phylogenetically permuted partial Mantel tests | ✓                                |             | ✓                                 |             |                              |
| (4) phylogenetic linear mixed models               | ✓                                | ✓           | ✓                                 | ✓           | ✓                            |
| (5) phylogenetic simulations                       | ✓                                | ✓           | ✓                                 | ✓           | ✓                            |
| (6) process-based models using maximum likelihood  | ✓                                |             |                                   |             |                              |
| (7) sister taxa GLMs                               |                                  | ✓           |                                   | ✓           |                              |
| (8) sister taxa process-based models in EvoRAG     |                                  | ✓           |                                   | ✓           |                              |

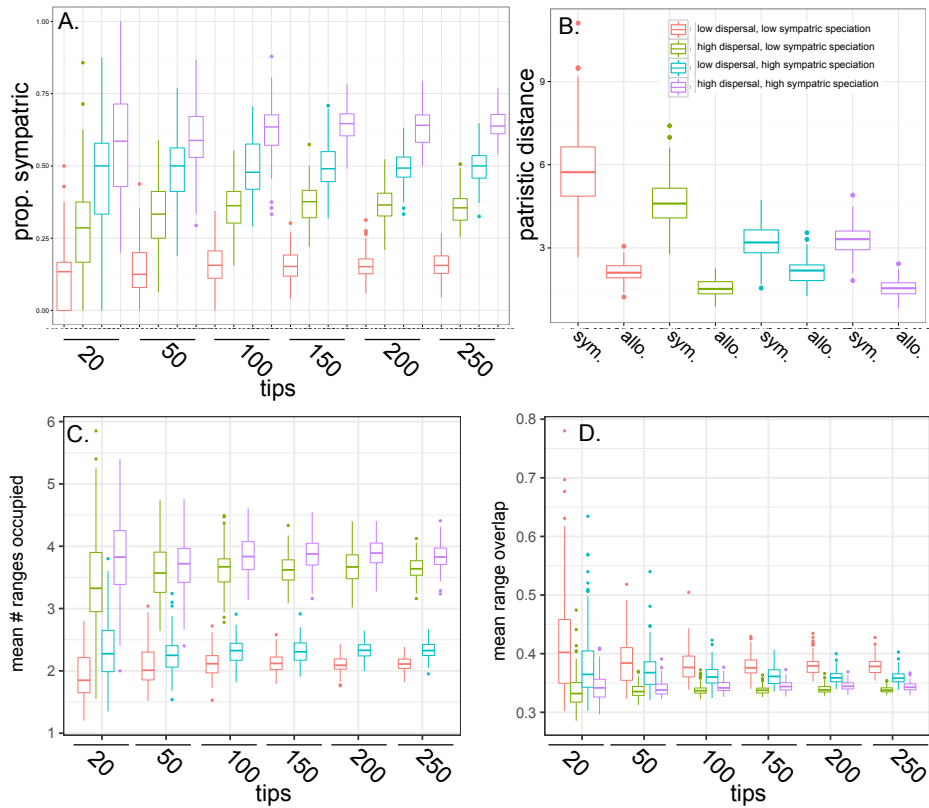

*Supplementary Figure 1.* The resulting biogeographic landscape under each of the four biogeographic scenarios. A. The proportion of sister taxa that are living in sympatry varies as a function of both the dispersal rate and the level of sympatric speciation. B. The patristic distances (the branch lengths separating sister taxa) are larger for sympatric taxa, although the magnitude of this difference depends on the biogeographic scenario. C. The mean number of ranges occupied at the tips is higher under high dispersal rates. D. The mean range overlap for sympatric species pairs, calculated as the number of areas two species both occur in, divided by the total number of areas occupied by the lineage with the smaller range.



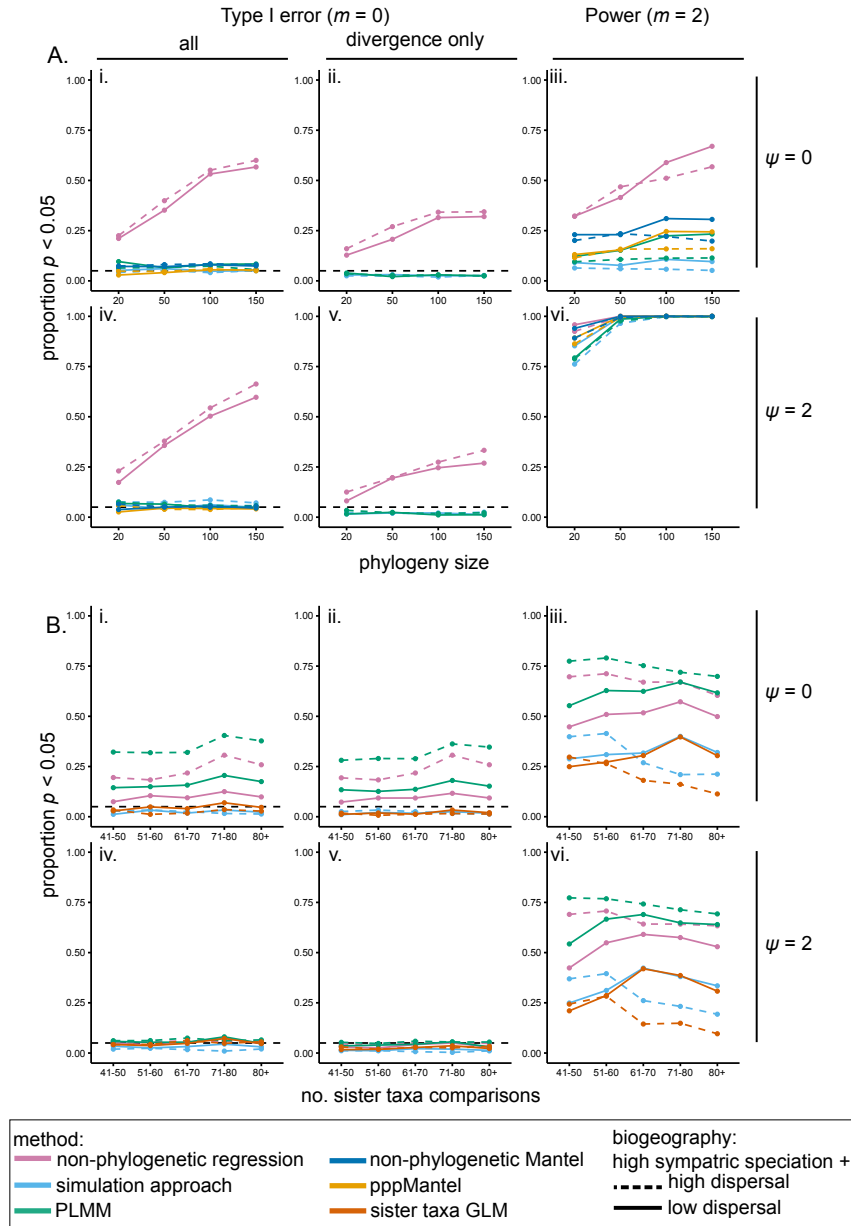

*Supplementary Figure 2.* Proportion of statistically significant analyses in datasets simulated under divergent character displacement in biogeographic scenarios with high sympatric speciation rates. A. Results from approaches using data from all pairwise comparisons in a clade, plotted as a function of the phylogeny size and dispersal rate when i-ii.  $m = 0$  and  $\psi = 0$  (i. all analyses and ii. only analyses returning divergence in sympatry), iii.  $m = 2$  and  $\psi = 0$ , iv-v.  $m = 0$  and  $\psi = 2$  (iv. all analyses and v. only analyses returning divergence in sympatry), and vi.  $m = 2$  and  $\psi = 2$ . B. Results from analyses of sister-taxa culled from complete phylogenies binned by the number of resulting species pairs, plotted as a function of the number of sister taxa comparisons and dispersal rate when i-ii.  $m = 0$  and  $\psi = 0$  (i. all analyses and ii. only analyses returning divergence in sympatry), iii.  $m = 2$  and  $\psi = 0$ , iv-v.  $m = 0$  and  $\psi = 2$  (iv. all analyses and v. only analyses returning divergence in sympatry), and vi.  $m = 2$  and  $\psi = 2$ . For scenarios where  $m = 2$ , only the proportion of significant results showing divergence are plotted. Dashed horizontal lines represent a Type I error rate of 5%.

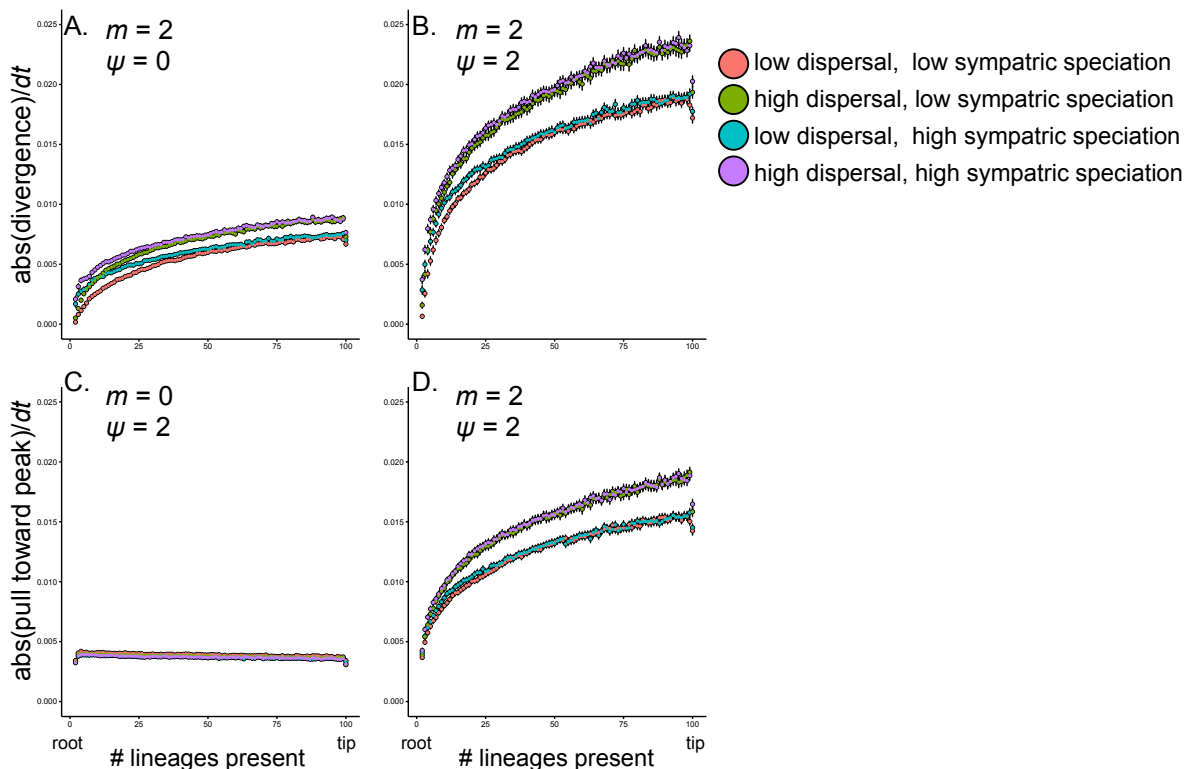

*Supplementary Figure 3.* The effect of repulsion on the magnitude of changes in traits from the root to the tip of phylogenies under different simulation scenarios. To calculate the absolute value of divergence steps (A & B), we recorded the absolute value of the magnitude of the step size resulting from the deterministic repulsion step of Eq. 1 (i.e.,  $m \left[ \sum_{j \neq i}^n \mathbf{A}_{i,j} \times \text{sign}(z_i(t) - z_j(t)) \times e^{-\alpha(y_j(t) - y_i(t))^2} \right] dt$ ) at each time step, took the mean during each internode interval for all extant lineages within trees, and then averaged each internode interval across all simulations. Each point thus represents the mean of means and the standard error across 100 phylogenies. The absolute value of the steps pulling trait values toward a stable peak (C & D) similarly represents the absolute value of the magnitude of the step size resulting from the deterministic component of the OU attraction to the peak in Eq. 1 (i.e.,  $\psi(\theta - z_i(t))dt$ ).

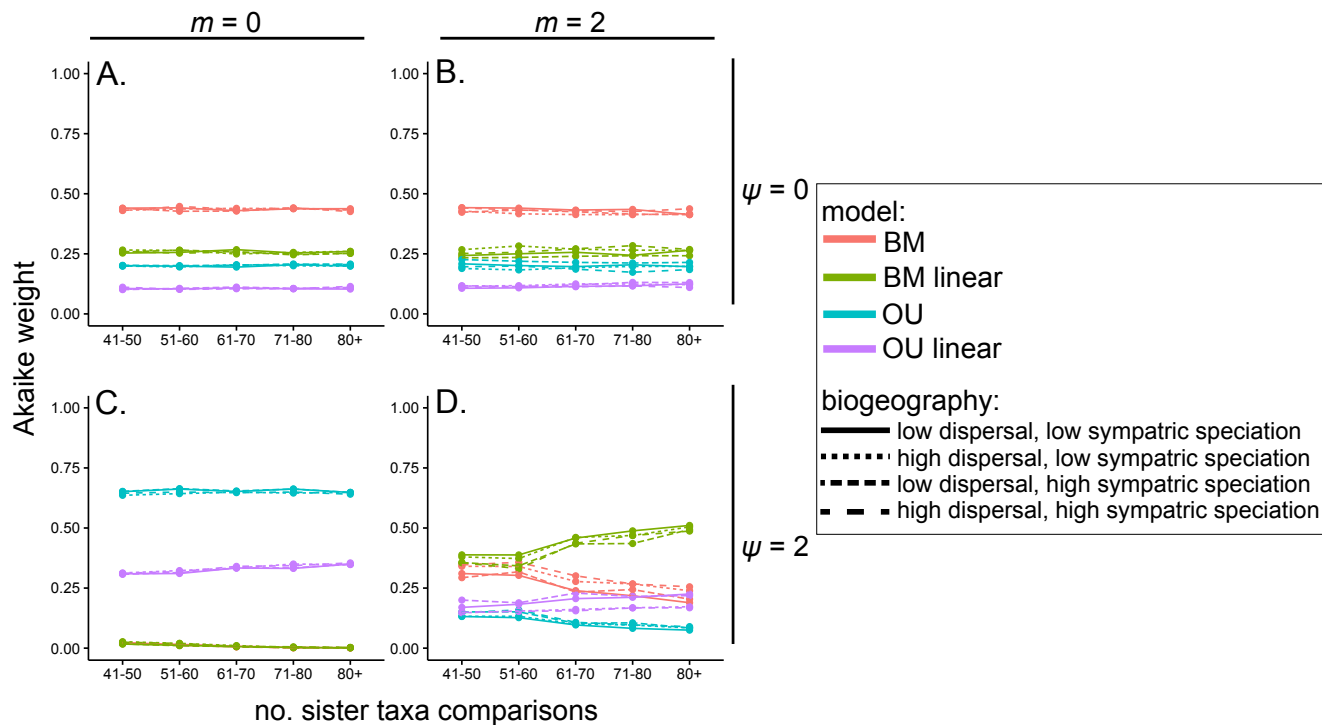

*Supplementary Figure 4.* Models fit to sister-taxa datasets generated under divergent character displacement scenarios in EvoRAG corroborate the influence of the number of sympatric lineages on the rate of evolution. A. When  $\psi = 0$ , BM is the best fitting model, whether A.  $m = 0$  or B.  $m = 2$ . When  $\psi = 2$ , OU is the best fitting model when C.  $m = 0$ , whereas a BM model that allows the rate of trait evolution to vary linearly with the number of sympatric lineages is a best fitting model when D.  $m = 2$ . Plots depict the Akaike weight of each model as a function of both the biogeographic scenario and the number of sister taxa comparisons.

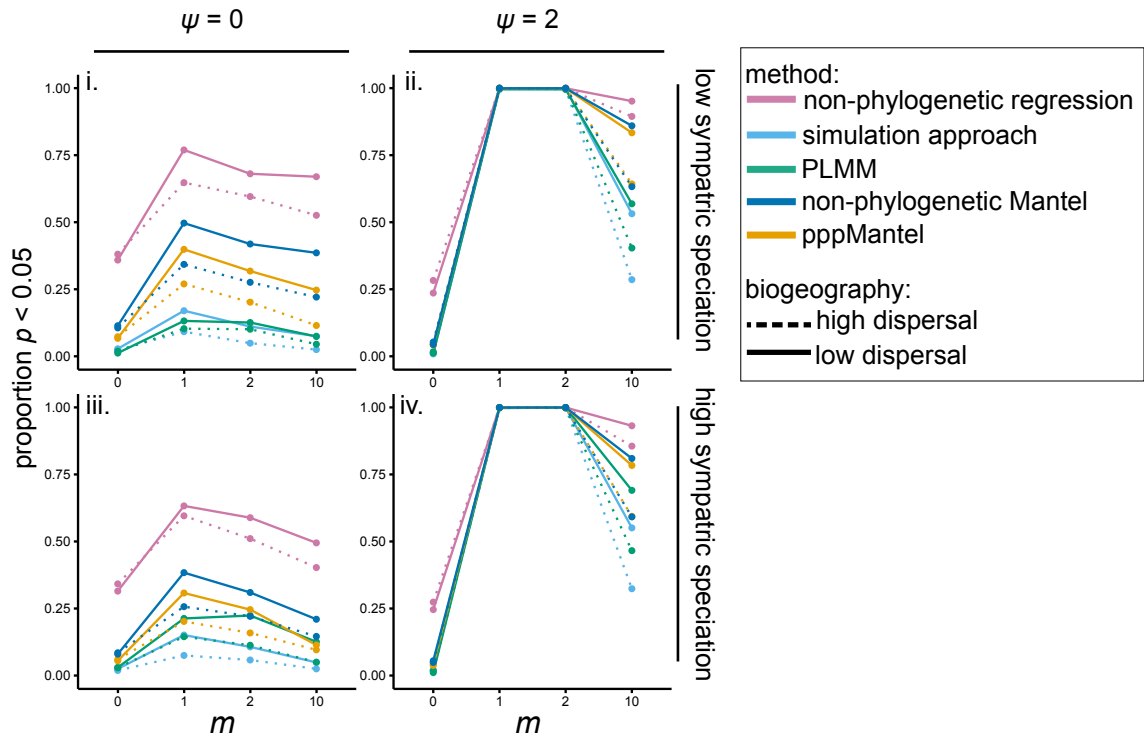

*Supplementary Figure 5.* The proportion of statistically significant analyses for datasets with divergent character displacement varies as a function of both  $m$  and  $\psi$ .

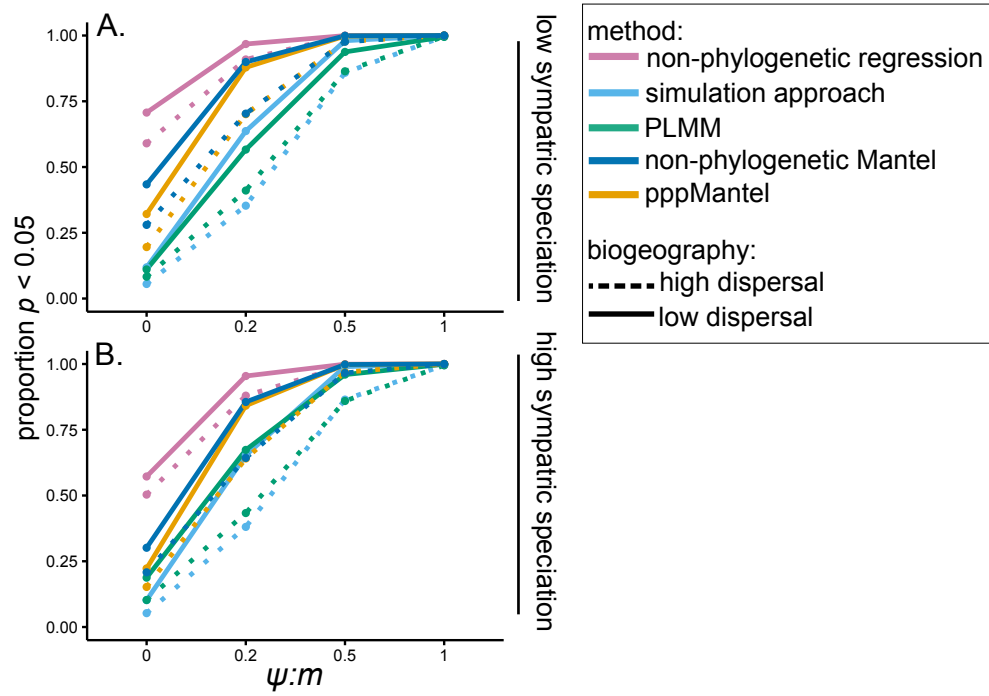

*Supplementary Figure 6.* As  $\psi:m$  increases, the ability of all methods to detect character displacement, when present, increases under both low sympatric speciation (A) and high sympatric speciation (B) scenarios.

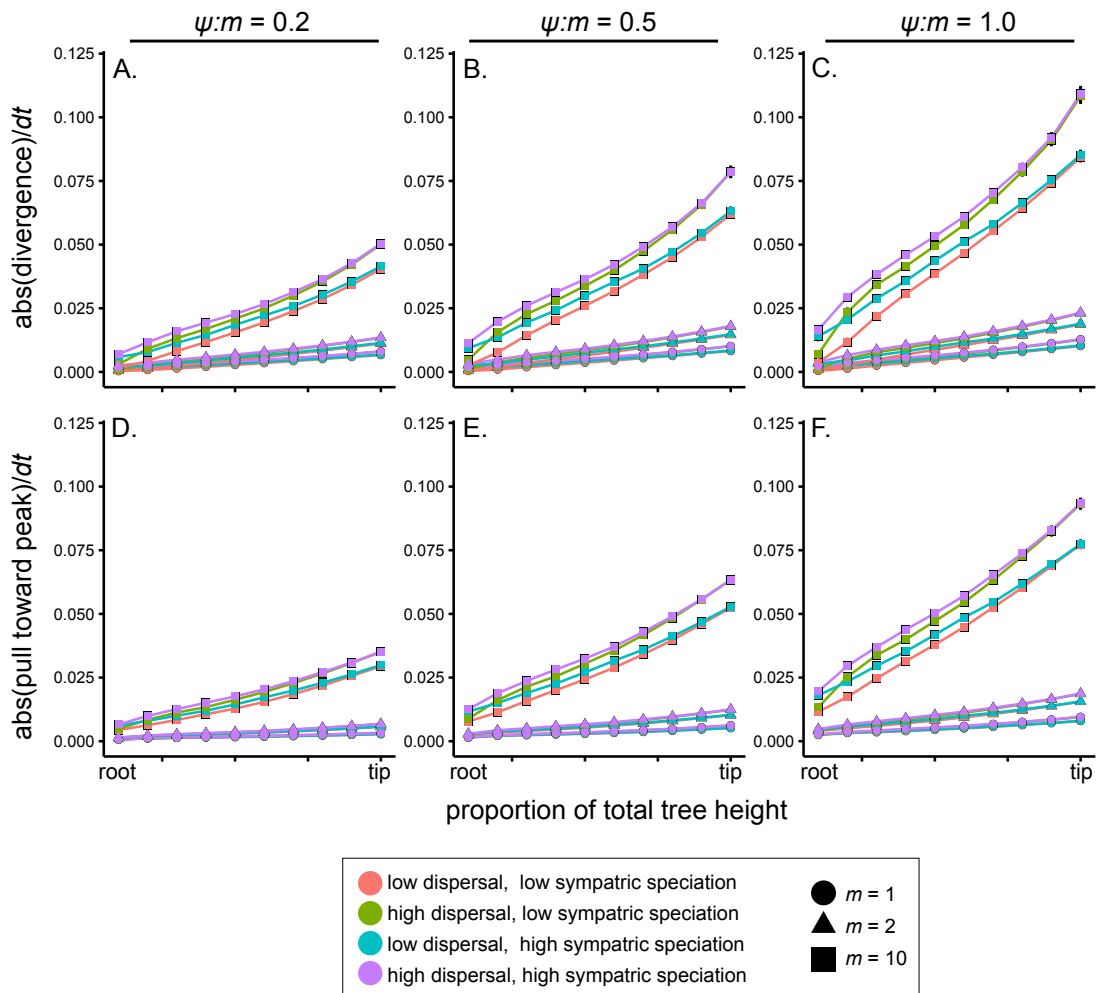

*Supplementary Figure 7.* The effect of repulsion on the magnitude of changes in traits from the root to the tip of phylogenies as a function of the ratio  $\psi:m$ . As  $\psi$  increases relative to  $m$ , both the magnitude of divergence steps (panels A-C) and the magnitude of the steps pulling trait values toward the peak (panels D-F) increase. This effect becomes increasingly apparent at higher  $m$  values and in biogeographic scenarios generated under high dispersal rates. For a description of the data, see the legend of Fig. S3. In this plot, data are averaged within 10 time bins representing each 10% of the total height of the phylogeny.

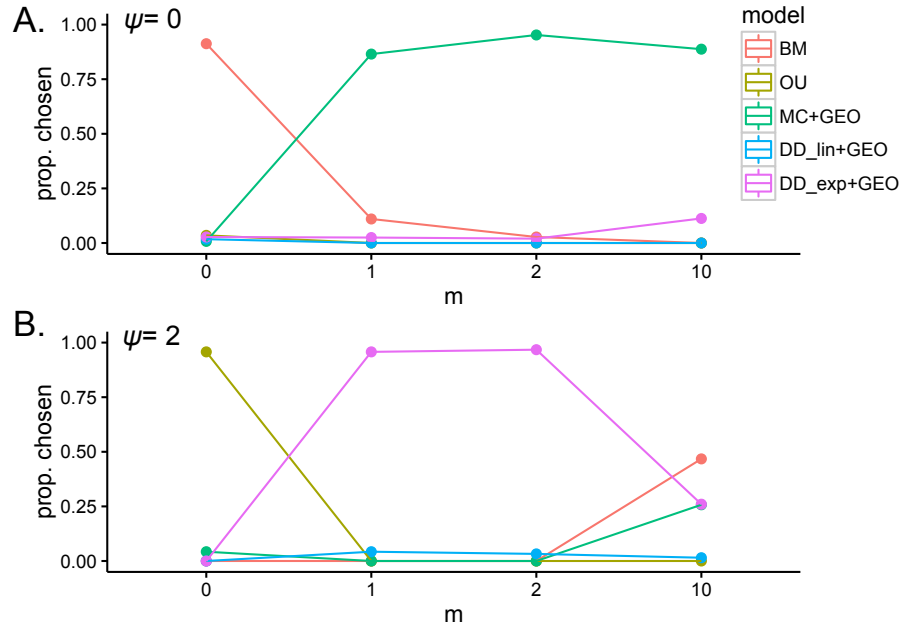

*Supplementary Figure 8.* Proportion of simulated datasets for which a given phenotypic model was chosen using model selection as a function of  $m$ . We considered a model to be chosen if it had the lowest AICc score among all of the models, and if the AICc score was  $> 2$  units away from BM model. A. Results for datasets simulated without the OU process. B. Results from datasets simulated with  $\psi = 2$ .

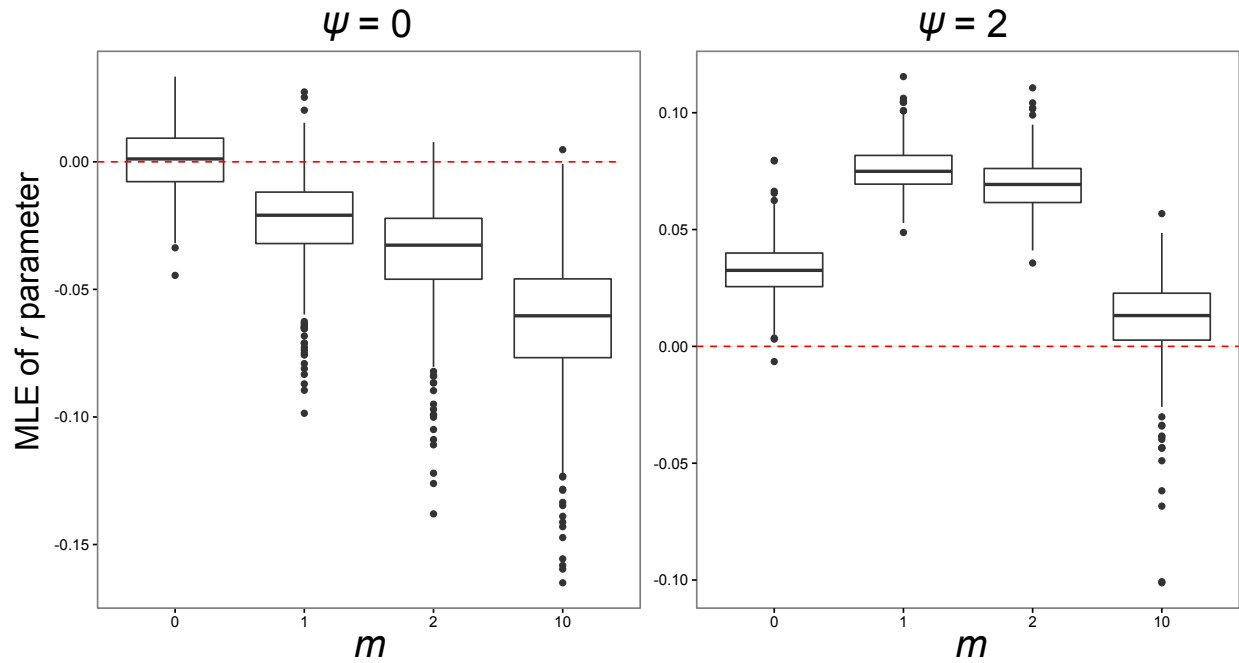

*Supplementary Figure 9.* The rate parameter  $r$  of the DDexp+GEO model is increasingly negative with increasing  $m$  values when  $\psi = 0$ , yet is positive when  $\psi > 0$ .



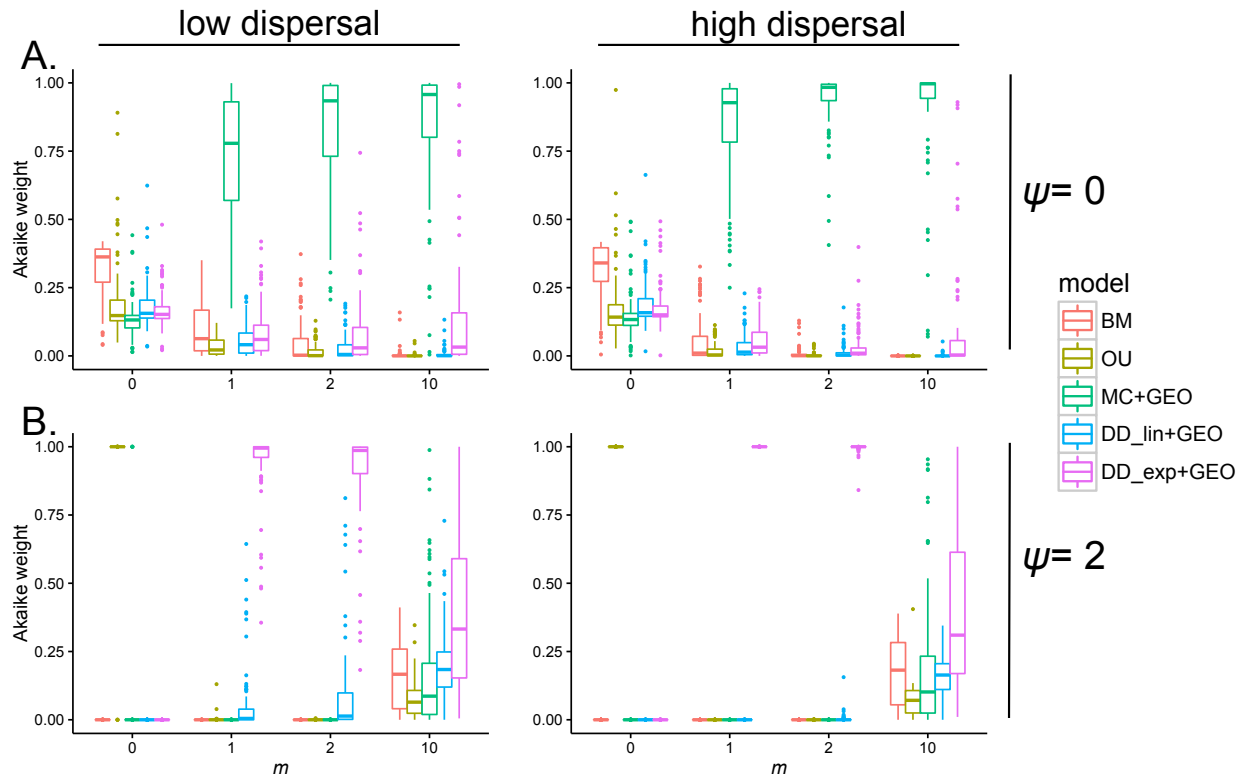

*Supplementary Figure 10.* Akaike weights for each trait model fit to simulated datasets in biogeographic scenarios with high sympatric speciation rates as a function of  $m$ . A. When OU is absent, BM is the best-fit model when  $m = 0$ , and the matching competition model with biogeography is the best model when competitive divergence is present. B. When OU is present, OU is the best-fit model when  $m = 0$ , and the diversity-dependent exponential model with biogeography is the best model when competitive divergence is present and  $\psi:m$  is relatively high.

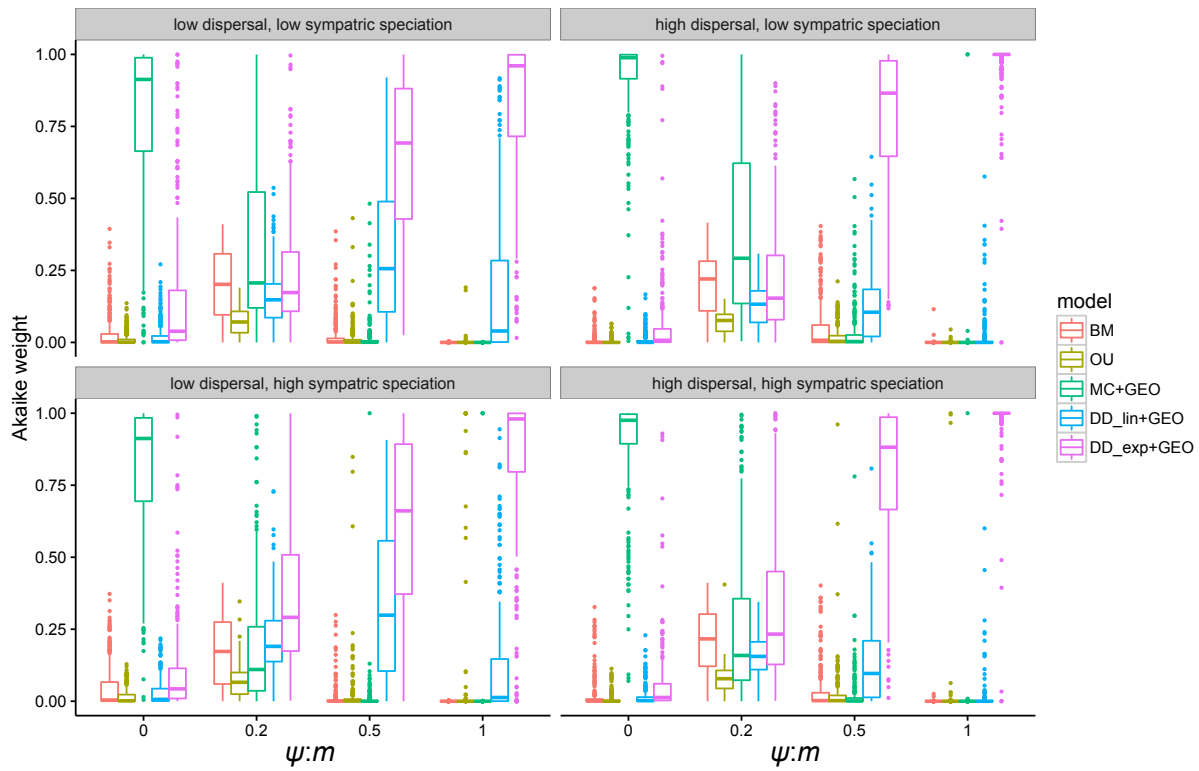

*Supplementary Figure 11.* As  $\psi:m$  increases, the DDexp + GEO model is increasingly better fit to datasets simulated with character displacement.

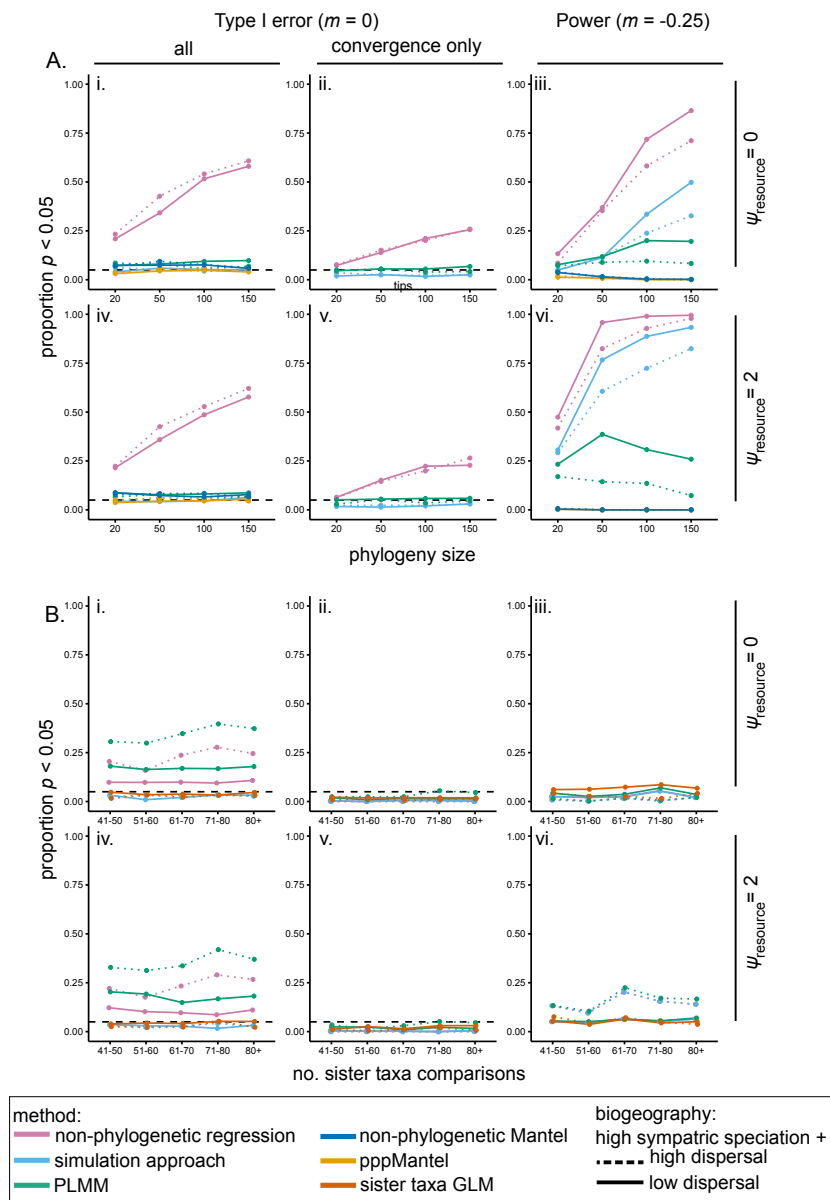

*Supplementary Figure 12.* Proportion of statistically significant analyses in datasets simulated under convergent character displacement in biogeographic scenarios with high sympatric speciation rates. A. Results from approaches using data from all pairwise comparisons in a clade, plotted as a function of the phylogeny size and dispersal rate when i-ii.  $m = 0$  and  $\psi_{\text{resource}} = 0$  (i. all analyses and ii. only analyses returning convergence in sympatry), iii.  $m = -0.25$  and  $\psi_{\text{resource}} = 0$ , iv-v.  $m = 0$  and  $\psi_{\text{resource}} = 2$  (iv. all analyses and v. only analyses returning convergence in sympatry), and vi.  $m = -0.25$  and  $\psi_{\text{resource}} = 2$ . B. Results from analyses of sister-taxa culled from complete phylogenies binned by the number of resulting species pairs, plotted as a function of the number of sister taxa comparisons and dispersal rate when i-ii.  $m = 0$  and  $\psi_{\text{resource}} = 0$  (i. all analyses and ii. only analyses returning convergence in sympatry), iii.  $m = -0.25$  and  $\psi_{\text{resource}} = 0$ , iv-v.  $m = 0$  and  $\psi_{\text{resource}} = 2$  (iv. all analyses and v. only analyses returning convergence in sympatry), and vi.  $m = -0.25$  and  $\psi_{\text{resource}} = 2$ . For scenarios where  $m = -0.25$ , only the proportion of significant results showing convergence are plotted. Dashed horizontal lines represent a Type I error rate of 5%.

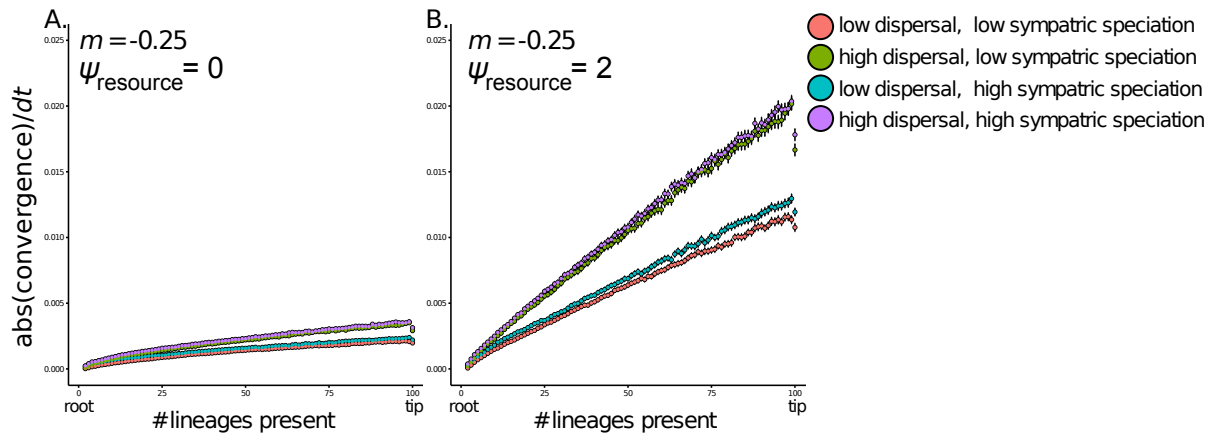

*Supplementary Figure 13.* The effect of convergence on the magnitude of changes in traits in simulations, plotted as a function of stabilizing selection in the resource-use trait ( $\psi_{\text{resource}}$ ) and biogeography. With  $\psi_{\text{resource}} = 2$ , the magnitude of convergence steps is higher, and this is particularly true for high dispersal biogeographies. Data generated as described in the legend of Fig. S3.

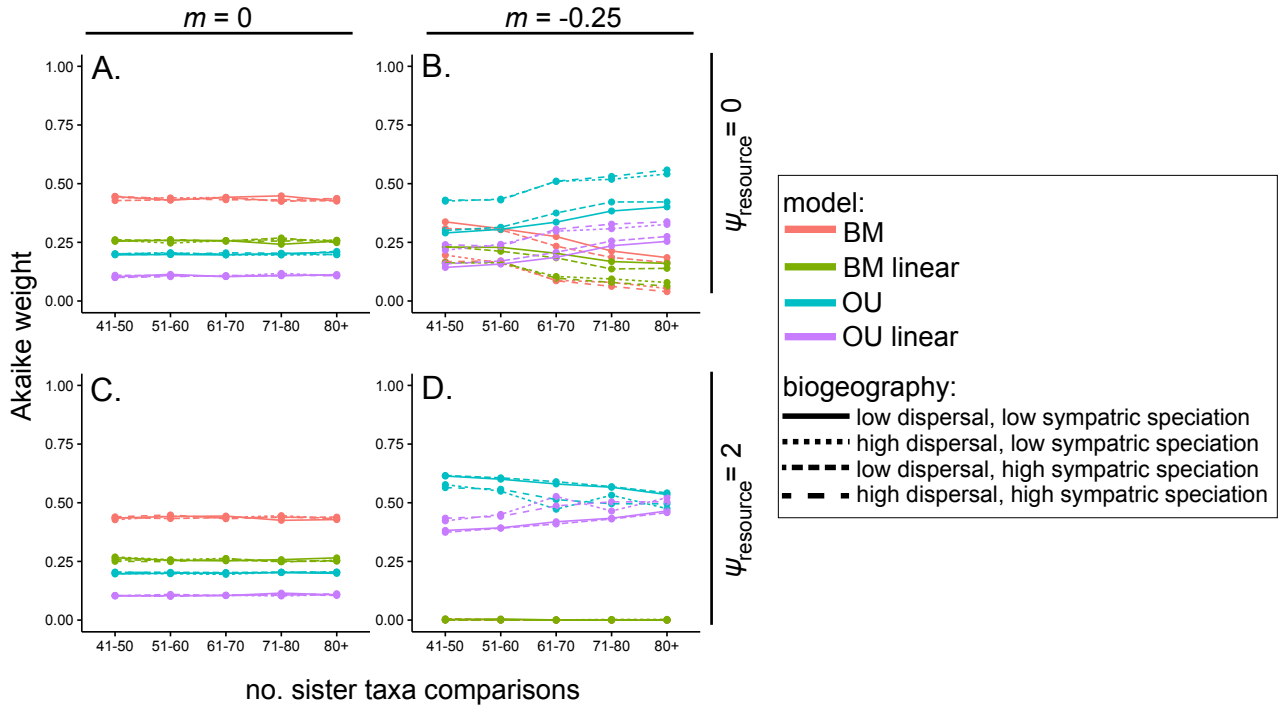

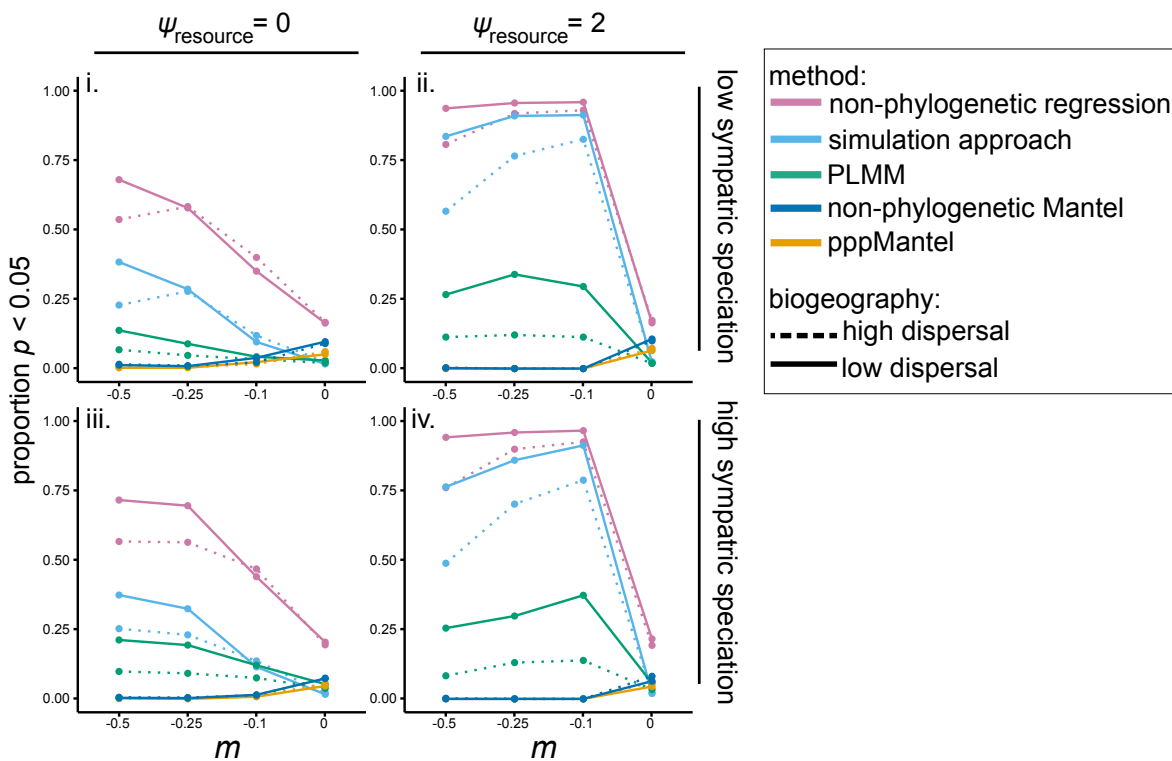

*Supplementary Figure 15.* The proportion of statistically significant analyses for datasets with convergent character displacement varies as a function of both  $m$ , and is generally lower in the absence of a pull toward a peak (i,iii) compared to cases where data were simulated with a pull toward a peak (ii,iv).

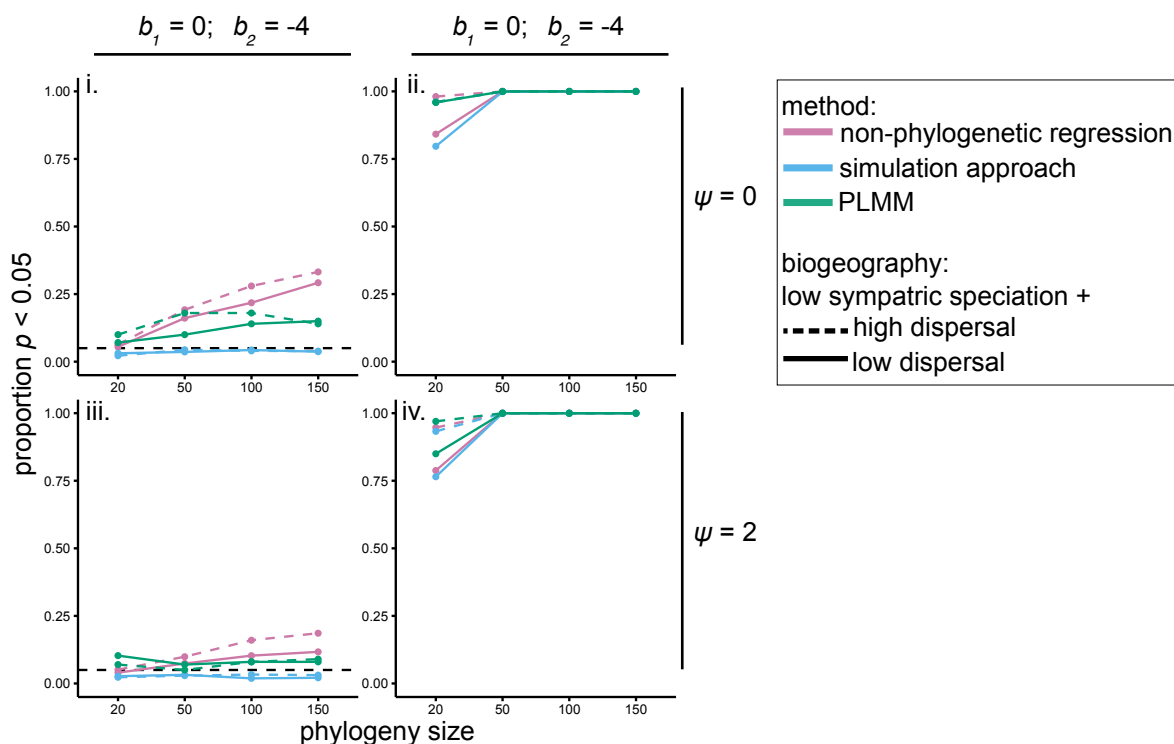

*Supplementary Figure 16.* Proportion of statistically significant analyses in datasets with interactions simulated under a simple phenotype matching process in biogeographic scenarios with high sympatric speciation rates. Results from analyses where the focal trait was simulated under A. BM or B. OU, plotted as a function of the dispersal rate when i.  $b_1$  (the simulation coefficient determining the relationship between the interaction and the measured trait) = 0,  $b_2$  (the simulation coefficient for an unmeasured trait) = -4, and  $\psi = 2$ , ii.  $b_1 = -4$ ,  $b_2 = 0$ , and  $\psi = 2$ , iii.  $b_1 = 0$ ,  $b_2 = -4$ , and  $\psi = 0$ , and iv.  $b_1 = -4$ ,  $b_2 = 0$ , and  $\psi = 0$ .

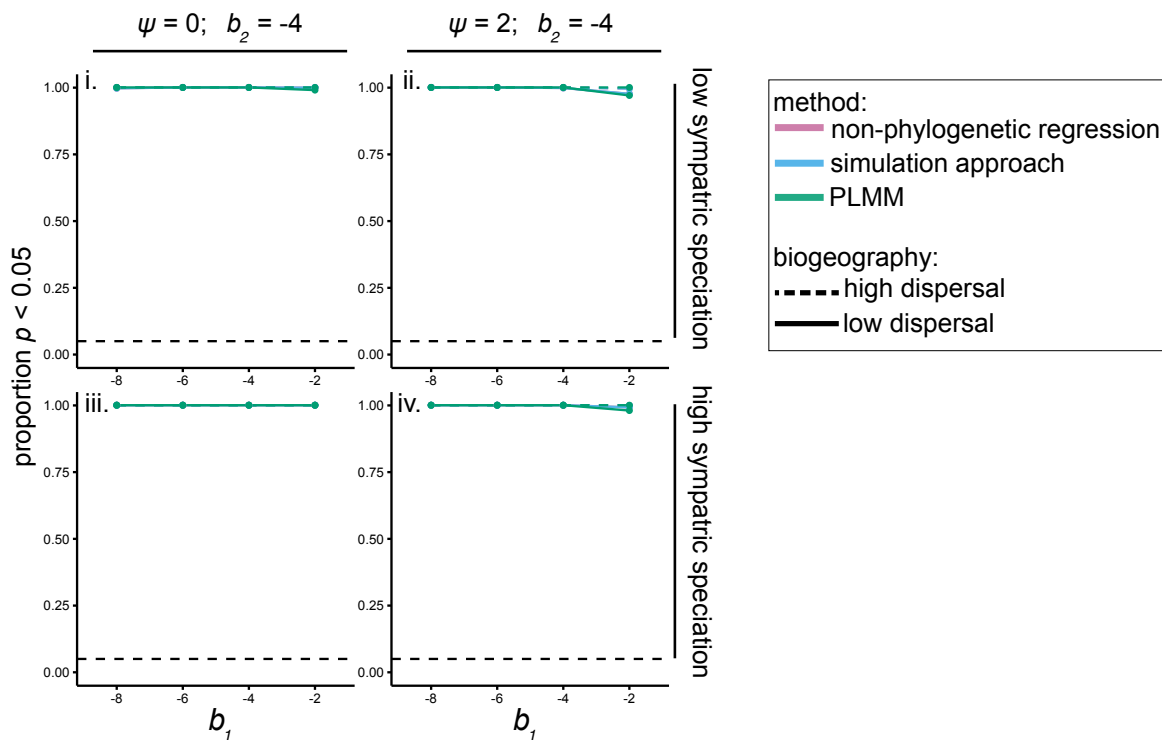

*Supplementary Figure 17.* The power to detect a causal relationship between a species interaction and similarity in a trait value is not affected greatly by varying the coefficient determining the strength of this relationship, regardless of whether the OU process is absent (i, iii) or present (ii, iv) in the measured trait. In these simulations, tree size was held constant at 100 species.
